# Supplementary material for: Targeted Sphingolipid Analysis in Heart, Gizzard, and Breast Muscle in Chickens Reveals Possible New Target Organs of Fumonisins
Source: Toxins (Basel). 2022 Nov 24;14(12):828. doi: 10.3390/toxins14120828 (PMC9783176; doi:10.3390/toxins14120828)
Supplement: Supplementary file 1 [file toxins-14-00828-s001.zip › Supplementary_Tables.xlsx]

## Sheet: Table S1
Table S1: Pearson coefficients of correlation among sphingolipids dosed in heart*
A: Chickens fed with a mycotoxins free diet
Variables	d18:1 (So)	d18:0 (Sa)	18:1/2:0	LysoSM	18:1/14:0	18:1/16:0	18:0/16:0	18:1/18:1	18:1/18:0	18:0/18:0	18:1/20:0	18:1/22:2	18:1/22:1	18:1/22:0	18:0/22:0	18:1/23:0	18:0/23:0	18:1/24:2	18:1/24:1	18:1/24:0	18:0/24:0	18:1/26:2	SM18:1/14:0	18:1/26:1	Hex18:1/16:0	SM18:1/16:0	SM18:0/16:0	Hex18:1/18:0	SM18:1/18:1	SM18:1/18:0	SM18:0/18:0	Hex18:1/20:0	SM18:1/20:0	SM18:0/20:0	SM18:1/22:2	Hex18:1/22:0	SM18:1/22:1	SM18:1/22:0	SM18:0/22:0	SM18:1/23:1	SM18:1/23:0	SM18:0/23:0	Hex18:1/24:1	SM18:1/24:2	Hex18:1/24:0	SM18:1/24:1	SM18:1/24:0	SM18:0/24:1	SM18:0/24:0
d18:1 (So)	1	0.223754	0.322422	0.0712709	0.237615	0.198448	-0.0755299	-0.0692861	0.0382056	-0.00528597	0.232774	-0.291186	-0.0853449	0.117201	-0.0998153	0.144195	-0.107139	-0.26303	-0.32187	0.569535	0.403218	0.0913168	-0.203806	0.507425	-0.730099	-0.303232	-0.212645	0.0551024	-0.142252	-0.171087	-0.11478	-0.102137	0.247624	0.218606	-0.115359	0.332472	0.101362	0.122392	0.341199	-0.215181	0.229524	0.274637	-0.223774	0.0715464	-0.180681	-0.333914	0.324678	0.411707	0.42931
d18:0 (Sa)	0.223754	1	0.737951	-0.0910377	-0.0919671	-0.0190404	0.110657	0.311181	-0.212816	0.304981	0.214424	0.184926	0.16914	-0.00175601	0.236986	0.105301	0.290085	0.296352	-0.189637	0.137368	0.608568	0.253777	0.209905	0.348596	0.0286492	-0.354619	-0.202737	0.181965	0.334115	-0.150762	-0.0930284	-0.367845	0.129358	-0.210893	0.323482	-0.321786	0.255647	0.00608885	0.111426	-0.0750528	0.257374	0.257418	-0.656789	0.422915	-0.460772	-0.32922	0.247073	0.391251	0.533943
18:1/2:0	0.322422	0.737951	1	0.0757434	0.36781	0.452238	0.37949	0.640435	0.0759679	0.189193	0.596825	0.488961	0.582272	0.482228	-0.047052	0.666301	0.132532	0.625637	0.309718	0.556458	0.867507	0.73027	0.493325	0.742411	0.151219	-0.122602	0.0751768	0.462339	0.499729	-0.186729	-0.0815519	-0.227095	-0.230644	-0.402242	0.402618	0.0279303	0.160099	0.0267646	0.111441	0.1108	0.41122	0.153791	-0.550414	0.331802	-0.213784	-0.174837	0.182016	0.560038	0.535372
LysoSM	0.0712709	-0.0910377	0.0757434	1	-0.253172	-0.171003	-0.177457	0.181985	-0.131009	-0.236371	0.0384991	-0.0477388	0.0262911	-0.104488	-0.423598	0.106464	0.101301	-0.0932197	0.0889546	-0.166675	-0.168679	0.108892	0.422193	0.128371	-0.27149	0.482778	0.780581	0.0413846	0.561227	0.594622	0.484631	-0.171224	0.29939	0.314712	0.379064	-0.38837	0.242846	-0.0120911	-0.227328	0.35763	-0.219404	-0.33392	-0.519104	-0.190682	-0.503087	0.362578	-0.169854	0.22008	0.164357
18:1/14:0	0.237615	-0.0919671	0.36781	-0.253172	1	0.98778	0.850347	0.629994	0.827362	0.372995	0.642852	0.569733	0.681026	0.715716	0.225842	0.56769	-0.0684725	0.461464	0.588499	0.56054	0.413124	0.614322	0.0795238	0.585661	-0.0196558	-0.0826701	0.0329975	0.753586	0.0975619	-0.136675	0.18077	0.598118	-0.282271	0.0220728	0.0953757	0.864625	-0.0591236	0.151537	0.294745	0.0789526	0.28193	0.102554	0.460272	-0.0854131	0.726051	0.0201824	0.161397	0.303525	0.178247
18:1/16:0	0.198448	-0.0190404	0.452238	-0.171003	0.98778	1	0.884958	0.731331	0.820498	0.392812	0.671437	0.642742	0.728739	0.730366	0.241439	0.621571	-0.0189453	0.53823	0.629364	0.540547	0.464119	0.688847	0.192352	0.61483	0.0268539	-0.0242578	0.134574	0.822346	0.236736	-0.0867824	0.236072	0.567999	-0.303747	-0.0150967	0.210618	0.792219	-0.059272	0.132636	0.256775	0.121733	0.2782	0.0413898	0.361742	-0.0700958	0.677881	0.0382618	0.123315	0.352203	0.192233
18:0/16:0	-0.0755299	0.110657	0.37949	-0.177457	0.850347	0.884958	1	0.800878	0.764498	0.408312	0.666972	0.736946	0.785398	0.690931	0.37877	0.504886	0.155117	0.571267	0.681668	0.359992	0.341159	0.666202	0.132843	0.534116	0.112389	-0.131214	0.0921924	0.874321	0.36738	-0.0798953	0.260581	0.538235	-0.279246	-0.025342	0.269404	0.590431	-0.0735529	0.0487563	0.0861489	0.130769	0.101325	-0.0248378	0.382554	-0.20364	0.67596	0.0557309	0.0720264	0.211965	0.167484
18:1/18:1	-0.0692861	0.311181	0.640435	0.181985	0.629994	0.731331	0.800878	1	0.431306	0.210023	0.641157	0.846542	0.782105	0.58916	0.125964	0.640769	0.282986	0.774744	0.623884	0.338856	0.585439	0.787034	0.582339	0.628221	0.231092	0.20397	0.408824	0.925671	0.807993	0.127531	0.402419	0.125359	-0.246355	-0.132425	0.731308	0.17537	0.04311	0.104887	0.104862	0.332619	0.223742	-0.125803	-0.0955981	0.105031	0.228765	0.157566	0.051162	0.449351	0.32454
18:1/18:0	0.0382056	-0.212816	0.0759679	-0.131009	0.827362	0.820498	0.764498	0.431306	1	0.688019	0.328279	0.336675	0.420281	0.392795	0.478639	0.201325	-0.0469536	0.149107	0.429383	0.0774957	-0.0522747	0.298841	0.0187616	0.16626	-0.0756469	0.0223616	0.255326	0.585492	-0.0286153	0.18496	0.449696	0.92527	-0.0275564	0.31986	-0.0277567	0.83002	0.0226434	0.128646	0.202238	0.0941651	0.0808331	-0.00544306	0.46877	-0.244313	0.767989	0.151532	0.0339798	0.193931	-0.0039873
18:0/18:0	-0.00528597	0.304981	0.189193	-0.236371	0.372995	0.392812	0.408312	0.210023	0.688019	1	-0.0970168	0.0587376	0.0153166	-0.154906	0.686992	-0.23605	0.164453	-0.0230394	-0.120148	-0.337583	-0.0605286	-0.0747303	0.129361	-0.179888	0.0328583	-0.00578462	0.164853	0.272826	-0.0901726	0.343172	0.484326	0.699706	0.328783	0.361865	0.0730282	0.398527	0.327599	0.248352	0.367759	0.0773052	0.252951	0.232821	-0.0239375	0.223026	0.312809	0.0705725	0.201223	0.348135	0.179386
18:1/20:0	0.232774	0.214424	0.596825	0.0384991	0.642852	0.671437	0.666972	0.641157	0.328279	-0.0970168	1	0.751959	0.92272	0.932858	0.0396153	0.859275	-0.340585	0.708727	0.768304	0.750644	0.652471	0.900193	-0.0613969	0.881486	-0.165638	-0.439329	-0.0873604	0.67628	0.370128	-0.462266	-0.118965	0.0886212	-0.459223	-0.24815	0.0612706	0.423479	-0.271812	-0.396584	-0.291133	-0.255054	-0.176664	-0.257817	0.155333	-0.328202	0.222083	-0.381823	-0.222125	-0.0257993	0.144393
18:1/22:2	-0.291186	0.184926	0.488961	-0.0477388	0.569733	0.642742	0.736946	0.846542	0.336675	0.0587376	0.751959	1	0.890079	0.734831	0.228139	0.718504	-0.137731	0.949292	0.791713	0.347189	0.563324	0.81643	0.286308	0.537306	0.312524	-0.0475543	0.15517	0.824389	0.618723	-0.189919	0.173684	0.1334	-0.502044	-0.29855	0.461915	0.211249	-0.254479	-0.274458	-0.209805	-0.0317584	-0.0904293	-0.365515	0.176644	-0.0412915	0.302268	-0.137873	-0.295864	-0.0276327	-0.0173799
18:1/22:1	-0.0853449	0.16914	0.582272	0.0262911	0.681026	0.728739	0.785398	0.782105	0.420281	0.0153166	0.92272	0.890079	1	0.890112	0.031979	0.827025	-0.175526	0.839	0.891752	0.567539	0.566271	0.899581	0.164764	0.761936	0.151839	-0.213723	0.0740891	0.745115	0.470219	-0.280683	0.0375019	0.177552	-0.474527	-0.269709	0.219535	0.372335	-0.141867	-0.246776	-0.222654	-0.00153278	-0.0596874	-0.207565	0.190667	-0.211097	0.31864	-0.11361	-0.168379	0.0334282	0.156578
18:1/22:0	0.117201	-0.00175601	0.482228	-0.104488	0.715716	0.730366	0.690931	0.58916	0.392795	-0.154906	0.932858	0.734831	0.890112	1	0.019443	0.910958	-0.352748	0.703077	0.863588	0.793005	0.590379	0.907186	-0.0571869	0.789899	0.017831	-0.356441	-0.110031	0.632535	0.26423	-0.564558	-0.264134	0.167704	-0.698649	-0.434508	-0.0384596	0.531089	-0.457536	-0.398934	-0.322668	-0.232802	-0.142613	-0.296573	0.346342	-0.412749	0.46075	-0.326649	-0.277808	-0.111274	-0.0682472
18:0/22:0	-0.0998153	0.236986	-0.047052	-0.423598	0.225842	0.241439	0.37877	0.125964	0.478639	0.686992	0.0396153	0.228139	0.031979	0.019443	1	-0.15619	-0.18142	0.0972099	-0.0498001	-0.258679	-0.0213852	0.00562099	-0.298596	-0.232374	-0.124623	-0.369359	-0.134457	0.345247	-0.0549751	-0.107371	0.204481	0.57417	-0.022272	0.143037	-0.0546471	0.316387	-0.335983	-0.337795	-0.119635	-0.51269	-0.309853	-0.294452	0.251104	-0.152111	0.400407	-0.477536	-0.323272	-0.234424	-0.345912
18:1/23:0	0.144195	0.105301	0.666301	0.106464	0.56769	0.621571	0.504886	0.640769	0.201325	-0.23605	0.859275	0.718504	0.827025	0.910958	-0.15619	1	-0.299805	0.777851	0.802175	0.77887	0.728579	0.961547	0.252191	0.805159	0.134507	-0.119298	0.106522	0.572215	0.459573	-0.444675	-0.235238	-0.0602522	-0.717674	-0.56022	0.172131	0.29985	-0.392395	-0.359518	-0.310747	-0.102936	-0.0191292	-0.338329	0.00815133	-0.212133	0.189695	-0.257509	-0.296879	0.0600791	-0.0079311
18:0/23:0	-0.107139	0.290085	0.132532	0.101301	-0.0684725	-0.0189453	0.155117	0.282986	-0.0469536	0.164453	-0.340585	-0.137731	-0.175526	-0.352748	-0.18142	-0.299805	1	-0.160015	-0.258196	-0.203851	-0.0380578	-0.16653	0.540718	-0.0410581	0.314597	0.435774	0.218757	0.119382	0.345228	0.462923	0.256999	-0.198144	0.338203	0.0655171	0.557031	-0.334612	0.544498	0.753848	0.547375	0.775282	0.614373	0.557122	-0.337135	0.401836	-0.06951	0.656932	0.708656	0.675018	0.565043
18:1/24:2	-0.26303	0.296352	0.625637	-0.0932197	0.461464	0.53823	0.571267	0.774744	0.149107	-0.0230394	0.708727	0.949292	0.839	0.703077	0.0972099	0.777851	-0.160015	1	0.730149	0.415756	0.704971	0.829346	0.379939	0.552658	0.445276	-0.0357554	0.0891275	0.677867	0.585161	-0.287864	-0.00318042	-0.0666369	-0.588758	-0.498293	0.449473	0.0908226	-0.238245	-0.271592	-0.196045	-0.0321436	0.0351664	-0.291302	0.00895647	0.126611	0.143455	-0.186313	-0.266318	0.0192286	0.0178948
18:1/24:1	-0.32187	-0.189637	0.309718	0.0889546	0.588499	0.629364	0.681668	0.623884	0.429383	-0.120148	0.768304	0.791713	0.891752	0.863588	-0.0498001	0.802175	-0.258196	0.730149	1	0.437103	0.28672	0.816522	0.154171	0.530472	0.298438	-0.0405269	0.208806	0.578388	0.37731	-0.25548	-0.0302991	0.272803	-0.661841	-0.371657	0.0673009	0.360837	-0.344285	-0.352204	-0.43333	0.0283751	-0.222297	-0.410567	0.358588	-0.447832	0.471812	0.0122798	-0.387323	-0.190066	-0.187282
18:1/24:0	0.569535	0.137368	0.556458	-0.166675	0.56054	0.540547	0.359992	0.338856	0.0774957	-0.337583	0.750644	0.347189	0.567539	0.793005	-0.258679	0.77887	-0.203851	0.415756	0.437103	1	0.750225	0.703393	-0.0924344	0.874424	-0.171205	-0.398375	-0.354265	0.369951	0.0819967	-0.65548	-0.502233	-0.194897	-0.518603	-0.449665	-0.08329	0.432671	-0.288665	-0.132691	0.00515018	-0.195929	0.185841	0.0786911	0.111838	-0.127051	0.18787	-0.368398	0.098827	0.158703	0.223621
18:0/24:0	0.403218	0.608568	0.867507	-0.168679	0.413124	0.464119	0.341159	0.585439	-0.0522747	-0.0605286	0.652471	0.563324	0.566271	0.590379	-0.0213852	0.728579	-0.0380578	0.704971	0.28672	0.750225	1	0.74011	0.286373	0.780573	0.088762	-0.246686	-0.195931	0.513192	0.419443	-0.467069	-0.271671	-0.354447	-0.413199	-0.514783	0.3669	0.107708	-0.123794	-0.0830952	0.116262	-0.127376	0.34885	0.0699134	-0.304385	0.340357	-0.108865	-0.406066	0.103079	0.370201	0.364229
18:1/26:2	0.0913168	0.253777	0.73027	0.108892	0.614322	0.688847	0.666202	0.787034	0.298841	-0.0747303	0.900193	0.81643	0.899581	0.907186	0.00562099	0.961547	-0.16653	0.829346	0.816522	0.703393	0.74011	1	0.28978	0.825625	0.131744	-0.154324	0.145066	0.723523	0.584404	-0.369385	-0.103631	0.0143655	-0.6373	-0.486542	0.292486	0.283525	-0.329199	-0.331511	-0.288218	-0.0655179	-0.0259414	-0.32815	-0.0255069	-0.210006	0.218709	-0.241599	-0.256749	0.12633	0.0756101
SM18:1/14:0	-0.203806	0.209905	0.493325	0.422193	0.0795238	0.192352	0.132843	0.582339	0.0187616	0.129361	-0.0613969	0.286308	0.164764	-0.0571869	-0.298596	0.252191	0.540718	0.379939	0.154171	-0.0924344	0.286373	0.28978	1	0.124096	0.553143	0.78242	0.713013	0.302449	0.679685	0.545899	0.41877	-0.180931	-0.0139568	-0.173101	0.796708	-0.30664	0.385861	0.466269	0.310165	0.75243	0.559922	0.103858	-0.564422	0.522629	-0.207033	0.600773	0.241723	0.684375	0.355923
18:1/26:1	0.507425	0.348596	0.742411	0.128371	0.585661	0.61483	0.534116	0.628221	0.16626	-0.179888	0.881486	0.537306	0.761936	0.789899	-0.232374	0.805159	-0.0410581	0.552658	0.530472	0.874424	0.780573	0.825625	0.124096	1	-0.212695	-0.301926	-0.080043	0.596465	0.412952	-0.363932	-0.152558	-0.163873	-0.289248	-0.238667	0.209558	0.308758	-0.0210382	-0.0615318	0.0201852	-0.00283965	0.174785	0.0625891	-0.108844	-0.0747205	0.0235598	-0.213746	0.148843	0.347043	0.482456
Hex18:1/16:0	-0.730099	0.0286492	0.151219	-0.27149	-0.0196558	0.0268539	0.112389	0.231092	-0.0756469	0.0328583	-0.165638	0.312524	0.151839	0.017831	-0.124623	0.134507	0.314597	0.445276	0.298438	-0.171205	0.088762	0.131744	0.553143	-0.212695	1	0.405913	0.11785	-0.0100476	0.165384	0.00714337	-0.140034	-0.114038	-0.451047	-0.597947	0.263336	-0.242908	0.0225879	0.193041	0.0326669	0.435229	0.371423	0.109993	-0.0174002	0.356421	0.167973	0.387195	0.0478244	0.0573451	-0.117423
SM18:1/16:0	-0.303232	-0.354619	-0.122602	0.482778	-0.0826701	-0.0242578	-0.131214	0.20397	0.0223616	-0.00578462	-0.439329	-0.0475543	-0.213723	-0.356441	-0.369359	-0.119298	0.435774	-0.0357554	-0.0405269	-0.398375	-0.246686	-0.154324	0.78242	-0.301926	0.405913	1	0.794383	0.0355393	0.387709	0.766011	0.561587	-0.00919866	0.169266	0.152169	0.596515	-0.25494	0.33754	0.533751	0.330935	0.766269	0.378331	0.0158521	-0.244093	0.358285	-0.0792691	0.797371	0.162137	0.440642	0.0592823
SM18:0/16:0	-0.212645	-0.202737	0.0751768	0.780581	0.0329975	0.134574	0.0921924	0.408824	0.255326	0.164853	-0.0873604	0.15517	0.0740891	-0.110031	-0.134457	0.106522	0.218757	0.0891275	0.208806	-0.354265	-0.195931	0.145066	0.713013	-0.080043	0.11785	0.794383	1	0.271776	0.607905	0.781663	0.728416	0.20793	0.165157	0.269664	0.573407	-0.160909	0.225777	0.17159	-0.0212226	0.550158	0.00968692	-0.332152	-0.350173	-0.00565392	-0.110568	0.57462	-0.160836	0.355397	0.0151898
Hex18:1/18:0	0.0551024	0.181965	0.462339	0.0413846	0.753586	0.822346	0.874321	0.925671	0.585492	0.272826	0.67628	0.824389	0.745115	0.632535	0.345247	0.572215	0.119382	0.677867	0.578388	0.369951	0.513192	0.723523	0.302449	0.596465	-0.0100476	0.0355393	0.271776	1	0.655117	0.036264	0.427394	0.322378	-0.217462	0.0289004	0.587814	0.408493	-0.115294	0.00727084	0.1058	0.100775	0.0723186	-0.206768	0.160688	-0.0458541	0.421624	-0.0200302	-0.0266051	0.303484	0.188368
SM18:1/18:1	-0.142252	0.334115	0.499729	0.561227	0.0975619	0.236736	0.36738	0.807993	-0.0286153	-0.0901726	0.370128	0.618723	0.470219	0.26423	-0.0549751	0.459573	0.345228	0.585161	0.37731	0.0819967	0.419443	0.584404	0.679685	0.412952	0.165384	0.387709	0.607905	0.655117	1	0.299103	0.421992	-0.256513	-0.12186	-0.13211	0.86661	-0.359086	0.00962798	-0.0220882	-0.127086	0.342761	0.00500138	-0.356071	-0.451709	0.0803989	-0.230732	0.179061	-0.132775	0.352449	0.215625
SM18:1/18:0	-0.171087	-0.150762	-0.186729	0.594622	-0.136675	-0.0867824	-0.0798953	0.127531	0.18496	0.343172	-0.462266	-0.189919	-0.280683	-0.564558	-0.107371	-0.444675	0.462923	-0.287864	-0.25548	-0.65548	-0.467069	-0.369385	0.545899	-0.363932	0.00714337	0.766011	0.781663	0.036264	0.299103	1	0.872266	0.220163	0.686713	0.668467	0.506688	-0.219789	0.653124	0.562502	0.392086	0.683089	0.223032	0.128263	-0.315694	0.289874	-0.208343	0.753903	0.270097	0.47484	0.296693
SM18:0/18:0	-0.11478	-0.0930284	-0.0815519	0.484631	0.18077	0.236072	0.260581	0.402419	0.449696	0.484326	-0.118965	0.173684	0.0375019	-0.264134	0.204481	-0.235238	0.256999	-0.00318042	-0.0302991	-0.502233	-0.271671	-0.103631	0.41877	-0.152558	-0.140034	0.561587	0.728416	0.427394	0.421992	0.872266	1	0.438328	0.591111	0.742597	0.576895	0.0510132	0.479698	0.367365	0.329826	0.446078	0.063346	-0.0616587	-0.10934	0.184925	-0.00037742	0.505929	0.10587	0.383873	0.24343
Hex18:1/20:0	-0.102137	-0.367845	-0.227095	-0.171224	0.598118	0.567999	0.538235	0.125359	0.92527	0.699706	0.0886212	0.1334	0.177552	0.167704	0.57417	-0.0602522	-0.198144	-0.0666369	0.272803	-0.194897	-0.354447	0.0143655	-0.180931	-0.163873	-0.114038	-0.00919866	0.20793	0.322378	-0.256513	0.220163	0.438328	1	0.0591621	0.425941	-0.24518	0.758541	-0.04091	0.00484427	0.0713123	-0.055393	-0.128717	-0.105886	0.562209	-0.338823	0.740803	0.101357	-0.126248	-0.0693648	-0.241124
SM18:1/20:0	0.247624	0.129358	-0.230644	0.29939	-0.282271	-0.303747	-0.279246	-0.246355	-0.0275564	0.328783	-0.459223	-0.502044	-0.474527	-0.698649	-0.022272	-0.717674	0.338203	-0.588758	-0.661841	-0.518603	-0.413199	-0.6373	-0.0139568	-0.289248	-0.451047	0.169266	0.165157	-0.217462	-0.12186	0.686713	0.591111	0.0591621	1	0.861438	0.131227	-0.179719	0.773331	0.527321	0.516708	0.300226	0.184107	0.454692	-0.299489	0.34218	-0.41546	0.353195	0.507413	0.377365	0.540504
SM18:0/20:0	0.218606	-0.210893	-0.402242	0.314712	0.0220728	-0.0150967	-0.025342	-0.132425	0.31986	0.361865	-0.24815	-0.29855	-0.269709	-0.434508	0.143037	-0.56022	0.0655171	-0.498293	-0.371657	-0.449665	-0.514783	-0.486542	-0.173101	-0.238667	-0.597947	0.152169	0.269664	0.0289004	-0.13211	0.668467	0.742597	0.425941	0.861438	1	0.0414888	0.178849	0.527884	0.343029	0.374279	0.153786	-0.0699956	0.16737	0.0846189	0.0209003	-0.0585871	0.296836	0.248833	0.172066	0.280049
SM18:1/22:2	-0.115359	0.323482	0.402618	0.379064	0.0953757	0.210618	0.269404	0.731308	-0.0277567	0.0730282	0.0612706	0.461915	0.219535	-0.0384596	-0.0546471	0.172131	0.557031	0.449473	0.0673009	-0.08329	0.3669	0.292486	0.796708	0.209558	0.263336	0.596515	0.573407	0.587814	0.86661	0.506688	0.576895	-0.24518	0.131227	0.0414888	1	-0.344512	0.28447	0.37611	0.323218	0.550038	0.363709	-0.0199901	-0.452938	0.49241	-0.226697	0.387328	0.206831	0.59165	0.390824
Hex18:1/22:0	0.332472	-0.321786	0.0279303	-0.38837	0.864625	0.792219	0.590431	0.17537	0.83002	0.398527	0.423479	0.211249	0.372335	0.531089	0.316387	0.29985	-0.334612	0.0908226	0.360837	0.432671	0.107708	0.283525	-0.30664	0.308758	-0.242908	-0.25494	-0.160909	0.408493	-0.359086	-0.219789	0.0510132	0.758541	-0.179719	0.178849	-0.344512	1	-0.155273	0.0328199	0.228833	-0.188178	0.0974521	0.0933001	0.653798	-0.251906	0.784112	-0.132166	0.0626292	0.0384937	-0.0535323
SM18:1/22:1	0.101362	0.255647	0.160099	0.242846	-0.0591236	-0.059272	-0.0735529	0.04311	0.0226434	0.327599	-0.271812	-0.254479	-0.141867	-0.457536	-0.335983	-0.392395	0.544498	-0.238245	-0.344285	-0.288665	-0.123794	-0.329199	0.385861	-0.0210382	0.0225879	0.33754	0.225777	-0.115294	0.00962798	0.653124	0.479698	-0.04091	0.773331	0.527884	0.28447	-0.155273	1	0.780666	0.681845	0.687394	0.60971	0.740264	-0.40592	0.599253	-0.363477	0.638538	0.764815	0.672595	0.82219
SM18:1/22:0	0.122392	0.00608885	0.0267646	-0.0120911	0.151537	0.132636	0.0487563	0.104887	0.128646	0.248352	-0.396584	-0.274458	-0.246776	-0.398934	-0.337795	-0.359518	0.753848	-0.271592	-0.352204	-0.132691	-0.0830952	-0.331511	0.466269	-0.0615318	0.193041	0.533751	0.17159	0.00727084	-0.0220882	0.562502	0.367365	0.00484427	0.527321	0.343029	0.37611	0.0328199	0.780666	1	0.911389	0.819142	0.856099	0.819165	-0.141723	0.636949	0.0192802	0.76468	0.909648	0.781568	0.681789
SM18:0/22:0	0.341199	0.111426	0.111441	-0.227328	0.294745	0.256775	0.0861489	0.104862	0.202238	0.367759	-0.291133	-0.209805	-0.222654	-0.322668	-0.119635	-0.310747	0.547375	-0.196045	-0.43333	0.00515018	0.116262	-0.288218	0.310165	0.0201852	0.0326669	0.330935	-0.0212226	0.1058	-0.127086	0.392086	0.329826	0.0713123	0.516708	0.374279	0.323218	0.228833	0.681845	0.911389	1	0.550236	0.865868	0.818906	-0.0743763	0.7359	0.0668638	0.470847	0.881995	0.764041	0.670937
SM18:1/23:1	-0.215181	-0.0750528	0.1108	0.35763	0.0789526	0.121733	0.130769	0.332619	0.0941651	0.0773052	-0.255054	-0.0317584	-0.00153278	-0.232802	-0.51269	-0.102936	0.775282	-0.0321436	0.0283751	-0.195929	-0.127376	-0.0655179	0.75243	-0.00283965	0.435229	0.766269	0.550158	0.100775	0.342761	0.683089	0.446078	-0.055393	0.300226	0.153786	0.550038	-0.188178	0.687394	0.819142	0.550236	1	0.659697	0.492343	-0.262112	0.417586	-0.0417127	0.949554	0.625496	0.694761	0.543415
SM18:1/23:0	0.229524	0.257374	0.41122	-0.219404	0.28193	0.2782	0.101325	0.223742	0.0808331	0.252951	-0.176664	-0.0904293	-0.0596874	-0.142613	-0.309853	-0.0191292	0.614373	0.0351664	-0.222297	0.185841	0.34885	-0.0259414	0.559922	0.174785	0.371423	0.378331	0.00968692	0.0723186	0.00500138	0.223032	0.063346	-0.128717	0.184107	-0.0699956	0.363709	0.0974521	0.60971	0.856099	0.865868	0.659697	1	0.818751	-0.265224	0.775913	0.0104	0.494112	0.849469	0.835538	0.678279
SM18:0/23:0	0.274637	0.257418	0.153791	-0.33392	0.102554	0.0413898	-0.0248378	-0.125803	-0.00544306	0.232821	-0.257817	-0.365515	-0.207565	-0.296573	-0.294452	-0.338329	0.557122	-0.291302	-0.410567	0.0786911	0.0699134	-0.32815	0.103858	0.0625891	0.109993	0.0158521	-0.332152	-0.206768	-0.356071	0.128263	-0.0616587	-0.105886	0.454692	0.16737	-0.0199901	0.0933001	0.740264	0.819165	0.818906	0.492343	0.818751	1	-0.11531	0.608362	-0.0494027	0.40192	0.954204	0.611133	0.749357
Hex18:1/24:1	-0.223774	-0.656789	-0.550414	-0.519104	0.460272	0.361742	0.382554	-0.0955981	0.46877	-0.0239375	0.155333	0.176644	0.190667	0.346342	0.251104	0.00815133	-0.337135	0.00895647	0.358588	0.111838	-0.304385	-0.0255069	-0.564422	-0.108844	-0.0174002	-0.244093	-0.350173	0.160688	-0.451709	-0.315694	-0.10934	0.562209	-0.299489	0.0846189	-0.452938	0.653798	-0.40592	-0.141723	-0.0743763	-0.262112	-0.265224	-0.11531	1	-0.450427	0.825563	-0.0700929	-0.168402	-0.521193	-0.463508
SM18:1/24:2	0.0715464	0.422915	0.331802	-0.190682	-0.0854131	-0.0700958	-0.20364	0.105031	-0.244313	0.223026	-0.328202	-0.0412915	-0.211097	-0.412749	-0.152111	-0.212133	0.401836	0.126611	-0.447832	-0.127051	0.340357	-0.210006	0.522629	-0.0747205	0.356421	0.358285	-0.00565392	-0.0458541	0.0803989	0.289874	0.184925	-0.338823	0.34218	0.0209003	0.49241	-0.251906	0.599253	0.636949	0.7359	0.417586	0.775913	0.608362	-0.450427	1	-0.369992	0.269776	0.602497	0.611586	0.556377
Hex18:1/24:0	-0.180681	-0.460772	-0.213784	-0.503087	0.726051	0.677881	0.67596	0.228765	0.767989	0.312809	0.222083	0.302268	0.31864	0.46075	0.400407	0.189695	-0.06951	0.143455	0.471812	0.18787	-0.108865	0.218709	-0.207033	0.0235598	0.167973	-0.0792691	-0.110568	0.421624	-0.230732	-0.208343	-0.00037742	0.740803	-0.41546	-0.0585871	-0.226697	0.784112	-0.363477	0.0192802	0.0668638	-0.0417127	0.0104	-0.0494027	0.825563	-0.369992	1	0.0570238	-0.0506739	-0.151819	-0.345672
SM18:1/24:1	-0.333914	-0.32922	-0.174837	0.362578	0.0201824	0.0382618	0.0557309	0.157566	0.151532	0.0705725	-0.381823	-0.137873	-0.11361	-0.326649	-0.477536	-0.257509	0.656932	-0.186313	0.0122798	-0.368398	-0.406066	-0.241599	0.600773	-0.213746	0.387195	0.797371	0.57462	-0.0200302	0.179061	0.753903	0.505929	0.101357	0.353195	0.296836	0.387328	-0.132166	0.638538	0.76468	0.470847	0.949554	0.494112	0.40192	-0.0700929	0.269776	0.0570238	1	0.512155	0.498043	0.35454
SM18:1/24:0	0.324678	0.247073	0.182016	-0.169854	0.161397	0.123315	0.0720264	0.051162	0.0339798	0.201223	-0.222125	-0.295864	-0.168379	-0.277808	-0.323272	-0.296879	0.708656	-0.266318	-0.387323	0.098827	0.103079	-0.256749	0.241723	0.148843	0.0478244	0.162137	-0.160836	-0.0266051	-0.132775	0.270097	0.10587	-0.126248	0.507413	0.248833	0.206831	0.0626292	0.764815	0.909648	0.881995	0.625496	0.849469	0.954204	-0.168402	0.602497	-0.0506739	0.512155	1	0.752966	0.82738
SM18:0/24:1	0.411707	0.391251	0.560038	0.22008	0.303525	0.352203	0.211965	0.449351	0.193931	0.348135	-0.0257993	-0.0276327	0.0334282	-0.111274	-0.234424	0.0600791	0.675018	0.0192286	-0.190066	0.158703	0.370201	0.12633	0.684375	0.347043	0.0573451	0.440642	0.355397	0.303484	0.352449	0.47484	0.383873	-0.0693648	0.377365	0.172066	0.59165	0.0384937	0.672595	0.781568	0.764041	0.694761	0.835538	0.611133	-0.521193	0.611586	-0.151819	0.498043	0.752966	1	0.804352
SM18:0/24:0	0.42931	0.533943	0.535372	0.164357	0.178247	0.192233	0.167484	0.32454	-0.0039873	0.179386	0.144393	-0.0173799	0.156578	-0.0682472	-0.345912	-0.0079311	0.565043	0.0178948	-0.187282	0.223621	0.364229	0.0756101	0.355923	0.482456	-0.117423	0.0592823	0.0151898	0.188368	0.215625	0.296693	0.24343	-0.241124	0.540504	0.280049	0.390824	-0.0535323	0.82219	0.681789	0.670937	0.543415	0.678279	0.749357	-0.463508	0.556377	-0.345672	0.35454	0.82738	0.804352	1
SM18:1/25:2	0.312863	0.134431	0.373153	-0.319348	0.320053	0.284697	-0.0263527	-0.0808774	0.216219	0.289843	0.294378	0.135614	0.205608	0.281693	0.178137	0.337386	-0.669844	0.278072	0.102137	0.314988	0.406623	0.233668	-0.13024	0.194639	-0.0494607	-0.308254	-0.221967	-0.0374664	-0.361329	-0.343786	-0.198205	0.222253	-0.201318	-0.141202	-0.345476	0.46539	-0.0822246	-0.254973	0.028391	-0.439641	0.0941785	0.0132075	0.0129036	0.207308	0.0353378	-0.475322	-0.171115	-0.0446157	-0.0524762
SM18:1/25:1	0.273159	0.537794	0.759028	0.139607	0.333499	0.392407	0.332553	0.586854	0.0760096	0.175503	0.240622	0.221106	0.331833	0.15112	-0.352161	0.312539	0.638644	0.313644	0.0795678	0.361498	0.582163	0.383146	0.685525	0.572985	0.247488	0.262937	0.193726	0.365335	0.446505	0.216289	0.150454	-0.248578	0.133463	-0.11755	0.576208	-0.0387484	0.608256	0.642688	0.591261	0.662982	0.806634	0.605083	-0.512324	0.5755	-0.178553	0.410498	0.707821	0.896699	0.853122
SM18:1/25:0	0.0805303	0.0464303	-0.146832	-0.341951	0.147627	0.0889432	0.226649	-0.085038	0.171786	0.193849	-0.242051	-0.342781	-0.185094	-0.194574	-0.0803211	-0.404481	0.692423	-0.422465	-0.251174	0.00410632	-0.215973	-0.320563	-0.112321	-0.028385	0.0440875	-0.0773741	-0.328956	-0.0675994	-0.300693	0.0709874	-0.0732753	0.106675	0.314436	0.175069	-0.107009	0.159309	0.429916	0.664557	0.556238	0.435297	0.495245	0.760675	0.209612	0.101453	0.309475	0.421036	0.783932	0.363928	0.464077
SM18:1/26:3	0.208104	0.688377	0.745018	0.424117	0.136535	0.245047	0.290041	0.690383	-0.00328015	0.224451	0.273751	0.352192	0.338423	0.0490774	-0.115032	0.249607	0.531928	0.38448	0.0298274	0.118622	0.53992	0.394133	0.68942	0.502574	0.0410522	0.254632	0.409286	0.498407	0.746602	0.393067	0.441691	-0.276377	0.298433	0.0849515	0.791325	-0.277384	0.543324	0.375286	0.349064	0.485516	0.450938	0.24014	-0.704047	0.491726	-0.431414	0.244118	0.400595	0.766903	0.759275
SM18:1/26:2	-0.0814429	0.292632	0.52866	0.529735	0.261775	0.378124	0.474927	0.851118	0.113725	0.00672485	0.342049	0.549487	0.498053	0.237789	-0.226448	0.396749	0.56362	0.503731	0.367611	0.123751	0.381572	0.525762	0.772433	0.484839	0.213202	0.491395	0.613146	0.667717	0.909539	0.444797	0.512275	-0.171048	0.047313	0.00660163	0.882388	-0.219566	0.329241	0.337524	0.189724	0.642965	0.311587	-0.00039172	-0.403597	0.227133	-0.139473	0.471641	0.230365	0.612025	0.509402
SM18:1/26:1	0.301459	0.276813	0.492061	-0.0114172	0.282026	0.290482	0.105587	0.243917	0.127953	0.271028	-0.105745	-0.130333	-0.00623197	-0.108616	-0.397492	0.0399008	0.608301	-0.0120641	-0.163201	0.203652	0.317804	0.0363742	0.605502	0.263424	0.276286	0.39187	0.145827	0.0563107	0.0551309	0.31004	0.119917	-0.0966451	0.248925	-0.00466943	0.335131	0.0943278	0.697248	0.837721	0.797056	0.718854	0.959011	0.79806	-0.383186	0.672853	-0.0709878	0.549858	0.83756	0.901363	0.759975
Lac18:1/16:0	0.0338518	-0.225352	-0.158094	-0.237759	0.0358745	-0.0391043	-0.309017	-0.370862	0.11537	0.311773	-0.457319	-0.379162	-0.350228	-0.422448	-0.204436	-0.37706	-0.0266553	-0.277618	-0.350071	-0.254705	-0.224415	-0.488293	0.115511	-0.361053	0.192878	0.3132	-0.0165769	-0.408932	-0.562968	0.322957	0.155272	0.210263	0.378922	0.295779	-0.192616	0.222721	0.562409	0.557442	0.619749	0.305625	0.551216	0.585729	0.0479946	0.584685	0.000223033	0.383127	0.451024	0.268455	0.224453
Lac18:1/18:0	0.231791	0.0107447	0.388125	-0.19303	0.960082	0.968917	0.878264	0.737573	0.787154	0.391963	0.668439	0.674395	0.699902	0.680889	0.342727	0.544416	-0.0515699	0.538162	0.545807	0.495098	0.467071	0.633476	0.106882	0.591974	-0.0910628	-0.0780863	0.0847154	0.884328	0.26616	-0.0730013	0.318983	0.550772	-0.207153	0.10377	0.271673	0.770017	-0.0739305	0.102366	0.281087	0.0275894	0.204113	-0.000962326	0.393718	-0.0385684	0.638113	-0.0482584	0.101806	0.304648	0.192461
ST18:1/24:1	0.0678188	-0.252322	-0.129614	-0.140111	0.734786	0.720367	0.744314	0.444673	0.84648	0.488831	0.345548	0.412072	0.37372	0.354062	0.58507	0.0964973	-0.0856778	0.148531	0.32505	0.0531119	-0.0658778	0.222027	-0.182219	0.150734	-0.303543	-0.0722302	0.137403	0.7134	0.0828797	0.141781	0.527161	0.794017	0.0586672	0.471876	0.100477	0.729201	-0.129121	0.0209343	0.159346	-0.0893227	-0.140357	-0.168169	0.600454	-0.29803	0.717732	-0.00914163	-0.0582222	0.0177463	-0.0816101
ST18:1/24:0	0.255519	-0.024753	0.122874	-0.261567	0.815185	0.790339	0.831274	0.561901	0.669501	0.267385	0.573346	0.49898	0.552799	0.55117	0.354851	0.28103	0.0645864	0.286868	0.37426	0.427181	0.264192	0.404401	-0.197652	0.51342	-0.296624	-0.270861	-0.150882	0.786332	0.13728	-0.12129	0.260356	0.48293	-0.0222941	0.274671	0.147524	0.695676	-0.053843	0.133023	0.284351	-0.0377604	0.0724287	0.0959752	0.543293	-0.179776	0.635381	-0.0692316	0.215337	0.167704	0.230512
Lac18:1/20:0	-0.00841597	-0.254053	-0.0860268	-0.438393	0.753769	0.696279	0.702649	0.175255	0.886969	0.553344	0.339403	0.241332	0.386051	0.443585	0.498986	0.12573	-0.185731	0.0636934	0.416278	0.158685	-0.122536	0.196459	-0.357986	0.116977	-0.0845006	-0.323575	-0.163723	0.382855	-0.349892	-0.15838	0.0977448	0.879798	-0.145325	0.190695	-0.388729	0.878952	-0.125868	-0.0198147	0.0754103	-0.14647	-0.0482925	0.065559	0.714454	-0.391544	0.865226	-0.0496672	0.0106946	-0.106907	-0.127968
Lac18:1/22:0	0.186784	-0.339248	-0.0974526	-0.0655035	0.627782	0.577808	0.479172	0.0367473	0.874378	0.566866	0.176462	-0.063213	0.181854	0.246003	0.275851	0.0298864	-0.133061	-0.226578	0.25643	0.0622331	-0.288771	0.0607031	-0.216674	0.068639	-0.264297	-0.0974115	0.130992	0.190621	-0.361764	0.140157	0.252129	0.883876	0.0998659	0.396515	-0.404514	0.812992	0.0934476	0.118025	0.137931	0.0385956	0.0103294	0.113957	0.453504	-0.403481	0.652496	0.154331	0.0871097	0.0973575	-0.00690653
Lac18:1/24:1	-0.0463981	-0.166638	0.0172849	-0.460864	0.842864	0.803885	0.854059	0.452104	0.797329	0.393312	0.538109	0.562491	0.603122	0.601235	0.487922	0.288299	-0.149428	0.369691	0.540403	0.295318	0.12323	0.387579	-0.27685	0.310915	-0.0437613	-0.315229	-0.198206	0.670093	-0.0730103	-0.220971	0.162529	0.704713	-0.222961	0.137178	-0.0921646	0.809731	-0.182074	-0.0304259	0.112089	-0.143908	-0.0373239	-0.00335607	0.749212	-0.270212	0.836997	-0.102785	0.00838635	-0.0915813	-0.0491052
Lac18:1/24:0	0.157788	-0.516978	-0.241471	-0.392552	0.732209	0.647139	0.50194	0.0052804	0.822182	0.383574	0.177943	0.0235211	0.173215	0.352367	0.297384	0.0826309	-0.219134	-0.128815	0.280551	0.222286	-0.1926	0.0618489	-0.34699	0.0500882	-0.161907	-0.140336	-0.121206	0.240217	-0.477283	-0.115141	0.0553014	0.827896	-0.139537	0.222716	-0.438879	0.937888	-0.161273	0.103472	0.206166	-0.0881501	0.0540414	0.104888	0.759954	-0.354278	0.876155	0.0406236	0.0710807	-0.0519716	-0.190686
B: Chickens fed 9 days with a diet containing 20.8 mg FB1+FB2/kg
Variables	d18:1 (So)	d18:0 (Sa)	18:1/2:0	LysoSM	18:1/14:0	18:1/16:0	18:0/16:0	18:1/18:1	18:1/18:0	18:0/18:0	18:1/20:0	18:1/22:2	18:1/22:1	18:1/22:0	18:0/22:0	18:1/23:0	18:0/23:0	18:1/24:2	18:1/24:1	18:1/24:0	18:0/24:0	18:1/26:2	SM18:1/14:0	18:1/26:1	Hex18:1/16:0	SM18:1/16:0	SM18:0/16:0	Hex18:1/18:0	SM18:1/18:1	SM18:1/18:0	SM18:0/18:0	Hex18:1/20:0	SM18:1/20:0	SM18:0/20:0	SM18:1/22:2	Hex18:1/22:0	SM18:1/22:1	SM18:1/22:0	SM18:0/22:0	SM18:1/23:1	SM18:1/23:0	SM18:0/23:0	Hex18:1/24:1	SM18:1/24:2	Hex18:1/24:0	SM18:1/24:1	SM18:1/24:0	SM18:0/24:1	SM18:0/24:0
d18:1 (So)	1	0.511982	0.402089	0.713199	0.656296	0.648031	-0.0395031	0.523013	0.700974	0.371499	0.427398	0.245536	0.509317	0.572249	0.135767	0.593811	0.183448	0.441956	0.655856	0.471842	-0.159622	0.445829	0.357897	0.328979	0.40762	0.72272	0.373644	0.467329	0.271595	0.610801	0.261347	0.671661	0.675649	0.0871799	0.321904	0.684107	0.449815	0.486028	0.359772	0.543501	0.42301	0.234692	0.690147	0.4134	0.6256	0.64562	0.397772	0.435908	0.458988
d18:0 (Sa)	0.511982	1	0.511653	0.358775	0.631991	0.684535	0.674811	0.8441	0.700534	0.588574	0.688508	0.735768	0.726418	0.79189	0.628605	0.761605	0.62535	0.637344	0.716306	0.853279	0.528707	0.643444	0.640679	0.782422	0.533438	0.652475	0.750446	0.881879	0.829839	0.780504	0.807825	0.716655	0.684504	0.494006	0.788463	0.54229	0.672945	0.645632	0.570099	0.570289	0.468623	0.302607	0.623078	0.423352	0.624431	0.502693	0.557586	0.62251	0.675819
18:1/2:0	0.402089	0.511653	1	0.563312	0.385099	0.449637	0.299961	0.7363	0.680457	0.224037	0.720876	0.648821	0.723138	0.630946	0.45177	0.623783	0.252229	0.783792	0.660326	0.566602	0.177519	0.678342	0.452735	0.55341	0.241419	0.091658	0.171727	0.507441	0.569126	0.217281	0.309748	0.542788	0.295074	-0.0397303	0.317196	0.365627	0.144827	-0.130511	0.0340482	0.0599754	-0.160093	-0.172996	0.34043	0.0719672	0.247689	0.0171807	-0.0730517	0.210908	-0.018585
LysoSM	0.713199	0.358775	0.563312	1	0.277555	0.299741	-0.052255	0.456668	0.438982	0.0227359	0.409362	0.318651	0.536798	0.476128	-0.0186576	0.502492	0.00735619	0.48707	0.663121	0.399726	-0.0908026	0.496996	0.176379	0.420946	0.0196422	0.364593	0.279384	0.364976	0.465645	0.528416	0.059462	0.346399	0.540601	-0.293545	0.502369	0.279155	0.333094	0.0831271	-0.0920153	0.25034	-0.0562985	-0.223685	0.361444	0.300283	0.202644	0.35944	-0.0333797	0.117116	0.127762
18:1/14:0	0.656296	0.631991	0.385099	0.277555	1	0.9953	0.573366	0.763753	0.90384	0.872105	0.441234	0.392355	0.561616	0.650945	0.598061	0.744389	0.640912	0.480125	0.625404	0.677326	0.251681	0.429539	0.624161	0.524197	0.805523	0.786339	0.600274	0.793724	0.256739	0.536251	0.454959	0.930158	0.562323	0.472973	0.22888	0.937851	0.614489	0.674398	0.776537	0.607402	0.777561	0.705562	0.935638	0.427086	0.960189	0.620621	0.792668	0.880237	0.682917
18:1/16:0	0.648031	0.684535	0.449637	0.299741	0.9953	1	0.621472	0.820042	0.927802	0.859135	0.503738	0.471198	0.62255	0.700872	0.622273	0.788718	0.647372	0.548824	0.672282	0.723128	0.278668	0.490538	0.663509	0.580976	0.809727	0.769705	0.62611	0.838312	0.338019	0.560369	0.483678	0.949691	0.564636	0.457077	0.284746	0.924572	0.620236	0.657394	0.752029	0.602265	0.741115	0.660123	0.925984	0.424372	0.949451	0.60236	0.767822	0.868002	0.667964
18:0/16:0	-0.0395031	0.674811	0.299961	-0.052255	0.573366	0.621472	1	0.759211	0.535964	0.588287	0.50676	0.711139	0.596956	0.613667	0.642716	0.669013	0.550843	0.536521	0.529132	0.727508	0.587687	0.516872	0.704259	0.737095	0.614093	0.408573	0.739264	0.852641	0.630569	0.490604	0.47855	0.613404	0.288662	0.375401	0.533505	0.417271	0.595367	0.504309	0.498014	0.433182	0.484968	0.42873	0.47035	0.326097	0.565821	0.311504	0.584661	0.631489	0.462991
18:1/18:1	0.523013	0.8441	0.7363	0.456668	0.763753	0.820042	0.759211	1	0.890147	0.573396	0.811999	0.842353	0.894244	0.892263	0.613118	0.928537	0.472873	0.851136	0.874037	0.893899	0.366179	0.808092	0.798946	0.841509	0.660214	0.580258	0.69309	0.938388	0.772442	0.642401	0.490706	0.885283	0.556455	0.212461	0.606621	0.679135	0.59762	0.458295	0.435887	0.503768	0.400086	0.266343	0.703901	0.361286	0.711786	0.447181	0.488144	0.618654	0.443178
18:1/18:0	0.700974	0.700534	0.680457	0.438982	0.90384	0.927802	0.535964	0.890147	1	0.715706	0.604598	0.542413	0.690149	0.720278	0.52359	0.791615	0.496991	0.658041	0.72337	0.717254	0.154439	0.574598	0.744902	0.568541	0.803094	0.69069	0.561403	0.788216	0.454548	0.538118	0.413445	0.978116	0.518884	0.26762	0.337603	0.906032	0.49571	0.485069	0.561391	0.513784	0.539694	0.44298	0.866249	0.330241	0.862887	0.511486	0.579509	0.69701	0.540961
18:0/18:0	0.371499	0.588574	0.224037	0.0227359	0.872105	0.859135	0.588287	0.573396	0.715706	1	0.201827	0.165643	0.271609	0.394557	0.731056	0.465387	0.878926	0.156857	0.303663	0.559083	0.523802	0.128602	0.4484	0.394828	0.717565	0.690834	0.528472	0.660956	0.131298	0.395782	0.653458	0.734034	0.504168	0.775598	0.177932	0.834159	0.569516	0.671776	0.929829	0.480423	0.805337	0.839728	0.853879	0.328287	0.86356	0.471704	0.8353	0.935019	0.8164
18:1/20:0	0.427398	0.688508	0.720876	0.409362	0.441234	0.503738	0.50676	0.811999	0.604598	0.201827	1	0.887792	0.951674	0.944245	0.60164	0.877605	0.188371	0.89959	0.869384	0.874956	0.402499	0.971048	0.551025	0.878936	0.211189	0.290351	0.392703	0.716841	0.755287	0.417501	0.367128	0.578133	0.587524	0.0954175	0.497869	0.34643	0.441353	0.212553	0.17989	0.292813	0.0904239	-0.0141855	0.389783	0.177182	0.380423	0.230891	0.177882	0.310709	0.0568362
18:1/22:2	0.245536	0.735768	0.648821	0.318651	0.392355	0.471198	0.711139	0.842353	0.542413	0.165643	0.887792	1	0.927559	0.881635	0.497144	0.85789	0.201943	0.936325	0.843009	0.801133	0.345585	0.913943	0.656303	0.86157	0.311995	0.237251	0.567535	0.806334	0.870842	0.530012	0.39153	0.552342	0.375904	0.0199519	0.642204	0.214823	0.46637	0.2409	0.106652	0.357579	0.0726438	-0.0764337	0.264225	0.304126	0.307767	0.240976	0.177308	0.288446	0.089089
18:1/22:1	0.509317	0.726418	0.723138	0.536798	0.561616	0.62255	0.596956	0.894244	0.690149	0.271609	0.951674	0.927559	1	0.975977	0.543658	0.96376	0.232453	0.959745	0.963311	0.886555	0.322104	0.978885	0.623917	0.907948	0.327424	0.393473	0.535704	0.834582	0.790559	0.559924	0.344846	0.67577	0.581535	0.0279641	0.576824	0.42056	0.539028	0.2954	0.200338	0.407519	0.173022	0.0236153	0.479252	0.324033	0.472028	0.358383	0.256854	0.403626	0.144156
18:1/22:0	0.572249	0.79189	0.630946	0.476128	0.650945	0.700872	0.613667	0.892263	0.720278	0.394557	0.944245	0.881635	0.975977	1	0.627686	0.977311	0.334989	0.894949	0.95022	0.940342	0.404454	0.950094	0.626427	0.923837	0.383665	0.520786	0.587413	0.873444	0.75698	0.612537	0.44885	0.726543	0.695041	0.195427	0.579779	0.515831	0.62758	0.450172	0.367565	0.493377	0.333997	0.182645	0.584333	0.36194	0.587578	0.451889	0.409318	0.523758	0.289486
18:0/22:0	0.135767	0.628605	0.45177	-0.0186576	0.598061	0.622273	0.642716	0.613118	0.52359	0.731056	0.60164	0.497144	0.543658	0.627686	1	0.5898	0.779738	0.429845	0.457773	0.760673	0.836482	0.496896	0.366314	0.695225	0.309613	0.35132	0.38399	0.665183	0.367401	0.243874	0.741148	0.49859	0.583483	0.76931	0.262828	0.47305	0.550468	0.41865	0.737334	0.299727	0.461549	0.56036	0.53152	0.225662	0.528186	0.217698	0.550546	0.75261	0.448043
18:1/23:0	0.593811	0.761605	0.623783	0.502492	0.744389	0.788718	0.669013	0.928537	0.791615	0.465387	0.877605	0.85789	0.96376	0.977311	0.5898	1	0.352506	0.894241	0.964088	0.915739	0.3303	0.911623	0.690688	0.894608	0.502255	0.578747	0.648498	0.916477	0.710464	0.642823	0.386903	0.805988	0.64762	0.15254	0.553694	0.60185	0.656566	0.484056	0.395753	0.546397	0.408059	0.252002	0.657829	0.421641	0.671174	0.514314	0.476267	0.59362	0.334621
18:0/23:0	0.183448	0.62535	0.252229	0.00735619	0.640912	0.647372	0.550843	0.472873	0.496991	0.878926	0.188371	0.201943	0.232453	0.334989	0.779738	0.352506	1	0.134477	0.199126	0.509247	0.727866	0.0869121	0.171728	0.43004	0.404229	0.41919	0.373349	0.589165	0.240249	0.288791	0.81052	0.479229	0.423554	0.829037	0.239116	0.547884	0.420412	0.472105	0.79868	0.225221	0.527261	0.5877	0.646534	0.163447	0.594792	0.189151	0.585108	0.770676	0.701726
18:1/24:2	0.441956	0.637344	0.783792	0.48707	0.480125	0.548824	0.536521	0.851136	0.658041	0.156857	0.89959	0.936325	0.959745	0.894949	0.429845	0.894241	0.134477	1	0.905631	0.744423	0.151842	0.935511	0.614725	0.782488	0.316547	0.236537	0.436231	0.74756	0.742025	0.459218	0.264013	0.626732	0.369299	-0.103309	0.482318	0.325261	0.378275	0.135437	0.0530132	0.322116	0.0227221	-0.118186	0.342655	0.28627	0.350195	0.248283	0.103022	0.272535	-0.00376609
18:1/24:1	0.655856	0.716306	0.660326	0.663121	0.625404	0.672282	0.529132	0.874037	0.72337	0.303663	0.869384	0.843009	0.963311	0.95022	0.457773	0.964088	0.199126	0.905631	1	0.85757	0.207131	0.934397	0.661854	0.852411	0.390164	0.555264	0.639128	0.839322	0.738483	0.702339	0.325862	0.715852	0.67731	0.0104301	0.633583	0.490253	0.664042	0.426464	0.255396	0.574742	0.295418	0.11266	0.542934	0.504057	0.536642	0.559374	0.361744	0.479785	0.262057
18:1/24:0	0.471842	0.853279	0.566602	0.399726	0.677326	0.723128	0.727508	0.893899	0.717254	0.559083	0.874956	0.801133	0.886555	0.940342	0.760673	0.915739	0.509247	0.744423	0.85757	1	0.628505	0.849388	0.645683	0.959892	0.440462	0.606479	0.675262	0.909618	0.770235	0.63988	0.579338	0.731639	0.784611	0.392621	0.652095	0.579538	0.726008	0.559961	0.535476	0.512405	0.462618	0.352341	0.668921	0.350766	0.663757	0.470139	0.554506	0.655358	0.473093
18:0/24:0	-0.159622	0.528707	0.177519	-0.0908026	0.251681	0.278668	0.587687	0.366179	0.154439	0.523802	0.402499	0.345585	0.322104	0.404454	0.836482	0.3303	0.727866	0.151842	0.207131	0.628505	1	0.295792	0.0721144	0.64904	0.00119626	0.159388	0.283884	0.487847	0.41653	0.154663	0.672383	0.152775	0.494106	0.703945	0.354947	0.159005	0.419435	0.296822	0.541659	0.0443972	0.264272	0.355805	0.312828	-0.0120528	0.264739	-0.0210101	0.362194	0.500557	0.38108
18:1/26:2	0.445829	0.643444	0.678342	0.496996	0.429539	0.490538	0.516872	0.808092	0.574598	0.128602	0.971048	0.913943	0.978885	0.950094	0.496896	0.911623	0.0869121	0.935511	0.934397	0.849388	0.295792	1	0.58441	0.882686	0.208973	0.315784	0.471508	0.738295	0.766956	0.502576	0.268064	0.561992	0.573303	-0.0352587	0.55473	0.297745	0.508652	0.235445	0.106111	0.377148	0.0933939	-0.0469947	0.346885	0.30232	0.350663	0.324144	0.175743	0.294707	0.0276077
SM18:1/14:0	0.357897	0.640679	0.452735	0.176379	0.624161	0.663509	0.704259	0.798946	0.744902	0.4484	0.551025	0.656303	0.623917	0.626427	0.366314	0.690688	0.171728	0.614725	0.661854	0.645683	0.0721144	0.58441	1	0.532344	0.831953	0.645806	0.811816	0.749813	0.570365	0.672302	0.321967	0.799671	0.381934	0.139497	0.561713	0.589038	0.646902	0.586454	0.415257	0.73135	0.546077	0.414708	0.496766	0.578722	0.631393	0.643857	0.609581	0.562667	0.477416
18:1/26:1	0.328979	0.782422	0.55341	0.420946	0.524197	0.580976	0.737095	0.841509	0.568541	0.394828	0.878936	0.86157	0.907948	0.923837	0.695225	0.894608	0.43004	0.782488	0.852411	0.959892	0.64904	0.882686	0.532344	1	0.261283	0.424772	0.607546	0.872579	0.827488	0.573066	0.48678	0.57997	0.681469	0.249629	0.670988	0.379667	0.646003	0.406249	0.349638	0.376756	0.275244	0.161222	0.508921	0.276543	0.487834	0.325423	0.378413	0.506825	0.299023
Hex18:1/16:0	0.40762	0.533438	0.241419	0.0196422	0.805523	0.809727	0.614093	0.660214	0.803094	0.717565	0.211189	0.311995	0.327424	0.383665	0.309613	0.502255	0.404229	0.316547	0.390164	0.440462	0.00119626	0.208973	0.831953	0.261283	1	0.727767	0.686263	0.651381	0.241463	0.530852	0.317282	0.872972	0.242274	0.312157	0.2657	0.821604	0.493865	0.651317	0.622653	0.640996	0.742772	0.64857	0.722392	0.432497	0.840805	0.601432	0.757617	0.695919	0.676316
SM18:1/16:0	0.72272	0.652475	0.091658	0.364593	0.786339	0.769705	0.408573	0.580258	0.69069	0.690834	0.290351	0.237251	0.393473	0.520786	0.35132	0.578747	0.41919	0.236537	0.555264	0.606479	0.159388	0.315784	0.645806	0.424772	0.727767	1	0.802381	0.676465	0.319941	0.826056	0.470501	0.761913	0.766025	0.447634	0.531836	0.789361	0.825673	0.921534	0.747442	0.862405	0.881001	0.716538	0.800312	0.665441	0.847141	0.907974	0.883131	0.792143	0.869813
SM18:0/16:0	0.373644	0.750446	0.171727	0.279384	0.600274	0.62611	0.739264	0.69309	0.561403	0.528472	0.392703	0.567535	0.535704	0.587413	0.38399	0.648498	0.373349	0.436231	0.639128	0.675262	0.283884	0.471508	0.811816	0.607546	0.686263	0.802381	1	0.8238	0.633083	0.920592	0.528735	0.651417	0.593872	0.331157	0.811017	0.483513	0.898078	0.839824	0.563912	0.875541	0.700855	0.51874	0.516154	0.782292	0.617645	0.81972	0.764858	0.696796	0.743643
Hex18:1/18:0	0.467329	0.881879	0.507441	0.364976	0.793724	0.838312	0.852641	0.938388	0.788216	0.660956	0.716841	0.806334	0.834582	0.873444	0.665183	0.916477	0.589165	0.74756	0.839322	0.909618	0.487847	0.738295	0.749813	0.872579	0.651381	0.676465	0.8238	1	0.750821	0.75072	0.59543	0.829615	0.626819	0.371959	0.679115	0.640844	0.758843	0.653638	0.583093	0.629864	0.571812	0.424015	0.715	0.501141	0.749424	0.569436	0.655933	0.747868	0.59746
SM18:1/18:1	0.271595	0.829839	0.569126	0.465645	0.256739	0.338019	0.630569	0.772442	0.454548	0.131298	0.755287	0.870842	0.790559	0.75698	0.367401	0.710464	0.240249	0.742025	0.738483	0.770235	0.41653	0.766956	0.570365	0.827488	0.241463	0.319941	0.633083	0.750821	1	0.671406	0.483813	0.459498	0.480399	0.032497	0.876858	0.165903	0.484738	0.294646	0.0713528	0.328805	0.0362837	-0.162457	0.268537	0.256151	0.252165	0.249251	0.148521	0.205905	0.262914
SM18:1/18:0	0.610801	0.780504	0.217281	0.528416	0.536251	0.560369	0.490604	0.642401	0.538118	0.395782	0.417501	0.530012	0.559924	0.612537	0.243874	0.642823	0.288791	0.459218	0.702339	0.63988	0.154663	0.502576	0.672302	0.573066	0.530852	0.826056	0.920592	0.75072	0.671406	1	0.535327	0.597242	0.70527	0.233915	0.876243	0.439652	0.856777	0.802866	0.453758	0.862823	0.585889	0.341421	0.499329	0.788975	0.541604	0.85338	0.632503	0.574391	0.717304
SM18:0/18:0	0.261347	0.807825	0.309748	0.059462	0.454959	0.483678	0.47855	0.490706	0.413445	0.653458	0.367128	0.39153	0.344846	0.44885	0.741148	0.386903	0.81052	0.264013	0.325862	0.579338	0.672383	0.268064	0.321967	0.48678	0.317282	0.470501	0.528735	0.59543	0.483813	0.535327	1	0.3968	0.580799	0.832056	0.554889	0.343148	0.576023	0.583905	0.722807	0.455688	0.460202	0.445905	0.415147	0.417317	0.40846	0.367821	0.539996	0.657801	0.71198
Hex18:1/20:0	0.671661	0.716655	0.542788	0.346399	0.930158	0.949691	0.613404	0.885283	0.978116	0.734034	0.578133	0.552342	0.67577	0.726543	0.49859	0.805988	0.479229	0.626732	0.715852	0.731639	0.152775	0.561992	0.799671	0.57997	0.872972	0.761913	0.651417	0.829615	0.459498	0.597242	0.3968	1	0.517627	0.288805	0.36666	0.91972	0.559152	0.600364	0.608421	0.595109	0.648129	0.522513	0.884085	0.374524	0.920423	0.58587	0.681403	0.732579	0.603004
SM18:1/20:0	0.675649	0.684504	0.295074	0.540601	0.562323	0.564636	0.288662	0.556455	0.518884	0.504168	0.587524	0.375904	0.581535	0.695041	0.583483	0.64762	0.423554	0.369299	0.67731	0.784611	0.494106	0.573303	0.381934	0.681469	0.242274	0.766025	0.593872	0.626819	0.480399	0.70527	0.580799	0.517627	1	0.485926	0.609736	0.531124	0.812317	0.695113	0.615152	0.639988	0.571218	0.465458	0.629087	0.518686	0.577779	0.689003	0.612762	0.653057	0.622208
SM18:0/20:0	0.0871799	0.494006	-0.0397303	-0.293545	0.472973	0.457077	0.375401	0.212461	0.26762	0.775598	0.0954175	0.0199519	0.0279641	0.195427	0.76931	0.15254	0.829037	-0.103309	0.0104301	0.392621	0.703945	-0.0352587	0.139497	0.249629	0.312157	0.447634	0.331157	0.371959	0.032497	0.233915	0.832056	0.288805	0.485926	1	0.14554	0.409826	0.484321	0.611219	0.894723	0.362413	0.652592	0.753532	0.453092	0.269413	0.480271	0.307216	0.687397	0.741496	0.71518
SM18:1/22:2	0.321904	0.788463	0.317196	0.502369	0.22888	0.284746	0.533505	0.606621	0.337603	0.177932	0.497869	0.642204	0.576824	0.579779	0.262828	0.553694	0.239116	0.482318	0.633583	0.652095	0.354947	0.55473	0.561713	0.670988	0.2657	0.531836	0.811017	0.679115	0.876858	0.876243	0.554889	0.36666	0.609736	0.14554	1	0.140508	0.710508	0.544061	0.212497	0.593691	0.251288	0.0366045	0.244238	0.567746	0.246906	0.543978	0.344496	0.326332	0.511499
Hex18:1/22:0	0.684107	0.54229	0.365627	0.279155	0.937851	0.924572	0.417271	0.679135	0.906032	0.834159	0.34643	0.214823	0.42056	0.515831	0.47305	0.60185	0.547884	0.325261	0.490253	0.579538	0.159005	0.297745	0.589038	0.379667	0.821604	0.789361	0.483513	0.640844	0.165903	0.439652	0.343148	0.91972	0.531124	0.409826	0.140508	1	0.476802	0.602391	0.721045	0.502371	0.738184	0.677704	0.964693	0.258474	0.965092	0.551293	0.736834	0.774863	0.675787
SM18:1/22:1	0.449815	0.672945	0.144827	0.333094	0.614489	0.620236	0.595367	0.59762	0.49571	0.569516	0.441353	0.46637	0.539028	0.62758	0.550468	0.656566	0.420412	0.378275	0.664042	0.726008	0.419435	0.508652	0.646902	0.646003	0.493865	0.825673	0.898078	0.758843	0.484738	0.856777	0.576023	0.559152	0.812317	0.484321	0.710508	0.476802	1	0.869107	0.685346	0.898644	0.756869	0.640281	0.534617	0.840271	0.601115	0.877569	0.81127	0.797601	0.726904
SM18:1/22:0	0.486028	0.645632	-0.130511	0.0831271	0.674398	0.657394	0.504309	0.458295	0.485069	0.671776	0.212553	0.2409	0.2954	0.450172	0.41865	0.484056	0.472105	0.135437	0.426464	0.559961	0.296822	0.235445	0.586454	0.406249	0.651317	0.921534	0.839824	0.653638	0.294646	0.802866	0.583905	0.600364	0.695113	0.611219	0.544061	0.602391	0.869107	1	0.813476	0.889914	0.928763	0.78652	0.633278	0.719182	0.737955	0.88264	0.938777	0.804004	0.89117
SM18:0/22:0	0.359772	0.570099	0.0340482	-0.0920153	0.776537	0.752029	0.498014	0.435887	0.561391	0.929829	0.17989	0.106652	0.200338	0.367565	0.737334	0.395753	0.79868	0.0530132	0.255396	0.535476	0.541659	0.106111	0.415257	0.349638	0.622653	0.747442	0.563912	0.583093	0.0713528	0.453758	0.722807	0.608421	0.615152	0.894723	0.212497	0.721045	0.685346	0.813476	1	0.622088	0.896712	0.927337	0.73637	0.469585	0.788016	0.603808	0.91616	0.940901	0.860131
SM18:1/23:1	0.543501	0.570289	0.0599754	0.25034	0.607402	0.602265	0.433182	0.503768	0.513784	0.480423	0.292813	0.357579	0.407519	0.493377	0.299727	0.546397	0.225221	0.322116	0.574742	0.512405	0.0443972	0.377148	0.73135	0.376756	0.640996	0.862405	0.875541	0.629864	0.328805	0.862823	0.455688	0.595109	0.639988	0.362413	0.593691	0.502371	0.898644	0.889914	0.622088	1	0.790717	0.634056	0.470614	0.925835	0.59654	0.975982	0.807143	0.70984	0.71348
SM18:1/23:0	0.42301	0.468623	-0.160093	-0.0562985	0.777561	0.741115	0.484968	0.400086	0.539694	0.805337	0.0904239	0.0726438	0.173022	0.333997	0.461549	0.408059	0.527261	0.0227221	0.295418	0.462618	0.264272	0.0933939	0.546077	0.275244	0.742772	0.881001	0.700855	0.571812	0.0362837	0.585889	0.460202	0.648129	0.571218	0.652592	0.251288	0.738184	0.756869	0.928763	0.896712	0.790717	1	0.942407	0.72755	0.600909	0.836887	0.799755	0.989558	0.881839	0.85811
SM18:0/23:0	0.234692	0.302607	-0.172996	-0.223685	0.705562	0.660123	0.42873	0.266343	0.44298	0.839728	-0.0141855	-0.0764337	0.0236153	0.182645	0.56036	0.252002	0.5877	-0.118186	0.11266	0.352341	0.355805	-0.0469947	0.414708	0.161222	0.64857	0.716538	0.51874	0.424015	-0.162457	0.341421	0.445905	0.522513	0.465458	0.753532	0.0366045	0.677704	0.640281	0.78652	0.927337	0.634056	0.942407	1	0.645692	0.484716	0.745226	0.633166	0.933424	0.88133	0.767618
Hex18:1/24:1	0.690147	0.623078	0.34043	0.361444	0.935638	0.925984	0.47035	0.703901	0.866249	0.853879	0.389783	0.264225	0.479252	0.584333	0.53152	0.657829	0.646534	0.342655	0.542934	0.668921	0.312828	0.346885	0.496766	0.508921	0.722392	0.800312	0.516154	0.715	0.268537	0.499329	0.415147	0.884085	0.629087	0.453092	0.244238	0.964693	0.534617	0.633278	0.73637	0.470614	0.72755	0.645692	1	0.235313	0.964946	0.532121	0.73661	0.796957	0.71587
SM18:1/24:2	0.4134	0.423352	0.0719672	0.300283	0.427086	0.424372	0.326097	0.361286	0.330241	0.328287	0.177182	0.304126	0.324033	0.36194	0.225662	0.421641	0.163447	0.28627	0.504057	0.350766	-0.0120528	0.30232	0.578722	0.276543	0.432497	0.665441	0.782292	0.501141	0.256151	0.788975	0.417317	0.374524	0.518686	0.269413	0.567746	0.258474	0.840271	0.719182	0.469585	0.925835	0.600909	0.484716	0.235313	1	0.340106	0.892376	0.623578	0.600959	0.560685
Hex18:1/24:0	0.6256	0.624431	0.247689	0.202644	0.960189	0.949451	0.565821	0.711786	0.862887	0.86356	0.380423	0.307767	0.472028	0.587578	0.528186	0.671174	0.594792	0.350195	0.536642	0.663757	0.264739	0.350663	0.631393	0.487834	0.840805	0.847141	0.617645	0.749424	0.252165	0.541604	0.40846	0.920423	0.577779	0.480271	0.246906	0.965092	0.601115	0.737955	0.788016	0.59654	0.836887	0.745226	0.964946	0.340106	1	0.624421	0.843563	0.84215	0.747601
SM18:1/24:1	0.64562	0.502693	0.0171807	0.35944	0.620621	0.60236	0.311504	0.447181	0.511486	0.471704	0.230891	0.240976	0.358383	0.451889	0.217698	0.514314	0.189151	0.248283	0.559374	0.470139	-0.0210101	0.324144	0.643857	0.325423	0.601432	0.907974	0.81972	0.569436	0.249251	0.85338	0.367821	0.58587	0.689003	0.307216	0.543978	0.551293	0.877569	0.88264	0.603808	0.975982	0.799755	0.633166	0.532121	0.892376	0.624421	1	0.796535	0.69266	0.720704
SM18:1/24:0	0.397772	0.557586	-0.0730517	-0.0333797	0.792668	0.767822	0.584661	0.488144	0.579509	0.8353	0.177882	0.177308	0.256854	0.409318	0.550546	0.476267	0.585108	0.103022	0.361744	0.554506	0.362194	0.175743	0.609581	0.378413	0.757617	0.883131	0.764858	0.655933	0.148521	0.632503	0.539996	0.681403	0.612762	0.687397	0.344496	0.736834	0.81127	0.938777	0.91616	0.807143	0.989558	0.933424	0.73661	0.623578	0.843563	0.796535	1	0.917913	0.87788
SM18:0/24:1	0.435908	0.62251	0.210908	0.117116	0.880237	0.868002	0.631489	0.618654	0.69701	0.935019	0.310709	0.288446	0.403626	0.523758	0.75261	0.59362	0.770676	0.272535	0.479785	0.655358	0.500557	0.294707	0.562667	0.506825	0.695919	0.792143	0.696796	0.747868	0.205905	0.574391	0.657801	0.732579	0.653057	0.741496	0.326332	0.774863	0.797601	0.804004	0.940901	0.70984	0.881839	0.88133	0.796957	0.600959	0.84215	0.69266	0.917913	1	0.820963
SM18:0/24:0	0.458988	0.675819	-0.018585	0.127762	0.682917	0.667964	0.462991	0.443178	0.540961	0.8164	0.0568362	0.089089	0.144156	0.289486	0.448043	0.334621	0.701726	-0.00376609	0.262057	0.473093	0.38108	0.0276077	0.477416	0.299023	0.676316	0.869813	0.743643	0.59746	0.262914	0.717304	0.71198	0.603004	0.622208	0.71518	0.511499	0.675787	0.726904	0.89117	0.860131	0.71348	0.85811	0.767618	0.71587	0.560685	0.747601	0.720704	0.87788	0.820963	1
SM18:1/25:2	-0.0691589	-0.378698	-0.0445694	-0.0845326	-0.0598553	-0.0832672	-0.34236	-0.282248	0.0135786	0.0129261	-0.622751	-0.540415	-0.545222	-0.602516	-0.480438	-0.498859	-0.0147817	-0.403003	-0.526379	-0.61204	-0.500869	-0.65241	-0.241983	-0.661921	0.161822	-0.233979	-0.403031	-0.408414	-0.458088	-0.39469	-0.314872	-0.0405451	-0.619002	-0.2507	-0.482925	0.106984	-0.618816	-0.390464	-0.213697	-0.421109	-0.210024	-0.151451	0.0121364	-0.403196	-0.0475531	-0.362344	-0.271216	-0.250327	-0.071984
SM18:1/25:1	0.235397	0.672274	0.18481	-0.0643819	0.729756	0.739781	0.785715	0.666369	0.650041	0.791892	0.377322	0.422922	0.416654	0.51807	0.677581	0.566585	0.578544	0.29878	0.451162	0.686269	0.485266	0.35183	0.805234	0.535124	0.801777	0.761608	0.82535	0.758123	0.383707	0.619205	0.606314	0.727785	0.55401	0.644168	0.479976	0.675175	0.797542	0.817372	0.82759	0.750467	0.842311	0.810843	0.648566	0.575597	0.769819	0.673424	0.903842	0.867005	0.779494
SM18:1/25:0	0.117398	0.304211	-0.429712	-0.397048	0.472076	0.443728	0.467591	0.207451	0.252755	0.475174	0.0202976	0.0821932	0.0453621	0.195495	0.216081	0.237041	0.19326	-0.0666835	0.108113	0.289084	0.123369	0.0283449	0.525726	0.145024	0.642743	0.657104	0.605249	0.389011	0.021284	0.434619	0.229344	0.430618	0.283003	0.453354	0.17964	0.446002	0.554264	0.814108	0.633377	0.664079	0.842488	0.752534	0.405721	0.428283	0.603856	0.624148	0.822172	0.557702	0.615272
SM18:1/26:3	0.445082	0.813894	0.611467	0.350147	0.661758	0.698974	0.646016	0.813607	0.712159	0.649632	0.741948	0.658015	0.735085	0.792007	0.835104	0.770195	0.582252	0.615754	0.74356	0.89466	0.615597	0.700326	0.689434	0.796034	0.486105	0.639676	0.699162	0.815983	0.630908	0.645904	0.731552	0.687718	0.802022	0.565276	0.631709	0.576219	0.801122	0.603282	0.670963	0.634132	0.532656	0.500441	0.604331	0.545471	0.610861	0.57294	0.629599	0.767441	0.584513
SM18:1/26:2	0.348245	0.84435	0.347712	0.320822	0.406287	0.463136	0.694573	0.758477	0.506241	0.277784	0.690647	0.792156	0.728387	0.757869	0.400725	0.731348	0.215764	0.633132	0.744422	0.804582	0.365818	0.722061	0.778497	0.778579	0.472683	0.6157	0.863543	0.805893	0.882556	0.845441	0.52071	0.574956	0.626053	0.200741	0.902296	0.319605	0.752848	0.643207	0.331174	0.680337	0.409421	0.195957	0.372341	0.54364	0.44721	0.599221	0.499837	0.434038	0.501079
SM18:1/26:1	0.27285	0.594351	0.120376	0.00923029	0.699447	0.698996	0.663126	0.55153	0.60299	0.7837	0.128	0.258086	0.241097	0.324659	0.498781	0.414752	0.57896	0.167623	0.341141	0.478149	0.291825	0.141873	0.748599	0.320937	0.828499	0.779693	0.844496	0.664019	0.266231	0.679242	0.60241	0.666544	0.448391	0.597681	0.478667	0.635399	0.777844	0.821747	0.80111	0.810625	0.842664	0.800371	0.592572	0.718676	0.705326	0.75021	0.886435	0.858047	0.856037
Lac18:1/16:0	0.637749	0.230637	0.183938	0.165779	0.864448	0.826638	0.192953	0.419231	0.724429	0.696553	0.100564	0.0320596	0.236403	0.312893	0.275633	0.439779	0.393928	0.229902	0.347937	0.2544	-0.160008	0.114176	0.398998	0.0793549	0.710276	0.624996	0.30135	0.424927	-0.188659	0.274671	0.151629	0.740053	0.273073	0.291844	-0.165724	0.834979	0.340642	0.488284	0.616871	0.492293	0.681981	0.653545	0.758583	0.371364	0.797208	0.545175	0.633803	0.691476	0.486091
Lac18:1/18:0	0.635922	0.626809	0.508449	0.314222	0.976745	0.981763	0.554189	0.785163	0.926376	0.848909	0.445229	0.421275	0.574594	0.633605	0.589593	0.730987	0.670664	0.536772	0.615454	0.635746	0.224578	0.425225	0.584358	0.501082	0.776659	0.674572	0.518308	0.776307	0.273999	0.466174	0.461548	0.921173	0.463177	0.421583	0.191873	0.907399	0.501177	0.538388	0.698612	0.496928	0.648284	0.591289	0.900969	0.35346	0.900701	0.500437	0.670944	0.819994	0.605276
ST18:1/24:1	0.627156	0.888226	0.558191	0.510593	0.823363	0.863634	0.739463	0.950073	0.868714	0.651244	0.683865	0.739595	0.813237	0.848356	0.551062	0.901384	0.530504	0.728541	0.858215	0.875081	0.347193	0.708303	0.78202	0.803417	0.710424	0.766864	0.83037	0.967875	0.743651	0.815669	0.553539	0.894484	0.668133	0.293262	0.705069	0.729939	0.745402	0.665473	0.55476	0.66856	0.577178	0.396631	0.783675	0.520174	0.795412	0.641767	0.64796	0.723135	0.647097
ST18:1/24:0	0.589962	0.857356	0.538459	0.390516	0.881317	0.909057	0.685789	0.877661	0.854713	0.811803	0.646637	0.61053	0.728931	0.804563	0.737575	0.834972	0.769679	0.617261	0.725372	0.867198	0.551028	0.601574	0.549643	0.782542	0.613317	0.681293	0.618253	0.909921	0.590392	0.599088	0.659342	0.856678	0.67497	0.520274	0.48647	0.794482	0.619092	0.596485	0.697999	0.465655	0.584179	0.486898	0.882118	0.297674	0.84516	0.453715	0.647479	0.79504	0.659806
Lac18:1/20:0	0.709983	0.73755	0.636263	0.418924	0.917298	0.938489	0.514428	0.855242	0.97407	0.77186	0.554048	0.498734	0.644635	0.693365	0.550316	0.756309	0.624068	0.60716	0.6663	0.695896	0.22207	0.504877	0.6215	0.553903	0.756932	0.671071	0.509173	0.784536	0.438377	0.513847	0.501688	0.949931	0.511962	0.358587	0.312895	0.905151	0.446534	0.487191	0.607957	0.443886	0.536714	0.440082	0.900401	0.261206	0.871934	0.448051	0.572063	0.710479	0.591629
Lac18:1/22:0	0.717554	0.276628	0.2052	0.340168	0.833522	0.792498	0.0881655	0.382824	0.714599	0.740574	0.0268803	-0.0960501	0.160188	0.246793	0.254745	0.360571	0.511119	0.105827	0.287928	0.25074	-0.0618827	0.0144524	0.241997	0.0735231	0.615203	0.65745	0.247235	0.382137	-0.154429	0.294473	0.221665	0.697761	0.378312	0.332393	-0.0948452	0.86763	0.304252	0.459763	0.622484	0.382063	0.630965	0.598635	0.845475	0.256242	0.797842	0.485007	0.584101	0.670606	0.585823
Lac18:1/24:1	0.787844	0.619693	0.579089	0.458262	0.93214	0.934058	0.357709	0.743688	0.926012	0.774424	0.484176	0.368782	0.581292	0.644057	0.544096	0.7112	0.609962	0.537458	0.639804	0.61875	0.161317	0.448326	0.494743	0.466031	0.665845	0.676738	0.417991	0.692842	0.258914	0.461391	0.464325	0.886612	0.557473	0.387585	0.183328	0.901181	0.457311	0.485149	0.646208	0.465707	0.567371	0.500753	0.894621	0.326133	0.851081	0.500823	0.579654	0.74628	0.566263
Lac18:1/24:0	0.76418	0.505015	0.379208	0.42013	0.950724	0.931487	0.33014	0.634033	0.866331	0.820054	0.296935	0.191277	0.430184	0.512153	0.451912	0.614337	0.5935	0.354319	0.534805	0.524125	0.110294	0.287919	0.453687	0.359317	0.707965	0.758658	0.449585	0.633601	0.110531	0.467101	0.36376	0.855974	0.543689	0.388814	0.124249	0.938787	0.498542	0.571255	0.700223	0.515379	0.694447	0.631077	0.936014	0.367214	0.90316	0.583542	0.68432	0.796873	0.649604
*Values in bold are different from 0 at significance level alpha=0.05
[truncated: 14 more columns]

## Sheet: Table S2
Table S2: Pearson coefficients of correlation among sphingolipids dosed in gizzard*
A: Chickens fed with a mycotoxins free diet
Variables	d18:1 (So)	d18:0 (Sa)	18:1/2:0	18:0/2:0	LysoSM	18:1/14:0	18:1/16:0	18:0/16:0	18:1/18:1	18:1/18:0	18:0/18:0	18:1/20:0	18:1/22:2	18:1/22:1	18:1/22:0	18:0/22:0	18:1/23:1	18:1/23:0	18:1/24:2	18:1/24:1	18:1/24:0	18:1/26:2	SM18:1/14:0	18:1/26:1	18:1/26:0	Hex18:1/16:0	SM18:1/16:0	SM18:0/16:0	Hex18:1/18:0	SM18:1/18:0	SM18:0/18:0	Hex18:1/20:0	SM18:1/20:0	SM18:0/20:0	SM18:1/22:2	Hex18:1/22:0	SM18:1/22:1	SM18:1/22:0	SM18:0/22:0	SM18:1/23:1	SM18:1/23:0	SM18:0/23:0	SM18:1/24:3	Hex18:1/24:1	SM18:1/24:2	Hex18:1/24:0	SM18:1/24:1	SM18:1/24:0	SM18:0/24:1
d18:1 (So)	1	-0.280254	-0.800297	-0.169423	-0.408078	0.868526	0.870912	0.858174	0.594897	0.836887	0.78148	0.849174	0.879148	0.889251	0.908654	0.0634937	0.750081	0.749988	0.819583	0.866763	0.653192	0.491118	0.134623	0.778853	0.123715	-0.263616	0.193074	-0.0953265	0.0576336	0.172694	-0.351151	-0.155655	0.228151	-0.22139	-0.121887	-0.0353331	-0.237411	-0.267401	-0.72164	-0.420645	-0.608984	-0.693807	0.592675	-0.142311	-0.309532	-0.259247	-0.427591	-0.416367	-0.557386
d18:0 (Sa)	-0.280254	1	0.397749	-0.273663	0.251466	-0.370213	-0.399801	-0.109466	-0.173028	-0.564867	-0.312261	-0.326081	-0.200084	-0.478976	-0.176918	0.276139	-0.465458	-0.107403	-0.0407037	-0.535672	0.0448045	0.413306	0.105691	-0.123539	0.14792	-0.180796	0.0651266	0.447592	0.0847208	-0.0729237	0.128963	0.142113	-0.235502	-0.191624	0.537203	-0.153357	0.241736	0.500148	0.187505	0.407919	0.271796	0.410568	0.321745	-0.130646	0.765939	0.114241	0.469388	0.605011	0.53136
18:1/2:0	-0.800297	0.397749	1	-0.0505581	0.232043	-0.793622	-0.795931	-0.808172	-0.40794	-0.762175	-0.529085	-0.827748	-0.703131	-0.823176	-0.856896	-0.190822	-0.479185	-0.655899	-0.641451	-0.848162	-0.658982	-0.296082	-0.124709	-0.795375	-0.293146	0.368532	-0.164226	0.38994	0.24379	-0.0957688	0.698948	0.603548	-0.10046	0.454557	0.210645	0.278338	0.308131	0.438076	0.718445	0.334036	0.556708	0.670871	-0.258499	0.363187	0.408441	0.419467	0.577005	0.546678	0.828228
18:0/2:0	-0.169423	-0.273663	-0.0505581	1	-0.214571	-0.222552	-0.126502	0.0752413	-0.22268	0.00819823	0.0878124	-0.00489695	-0.156406	0.105574	-0.0209976	0.460252	0.00426091	0.0128138	-0.327548	0.0906185	-0.0405748	-0.29014	-0.336922	0.205959	-0.229392	-0.148972	-0.392604	-0.368775	-0.211004	-0.346695	0.132417	-0.170824	-0.637002	0.112169	-0.410768	-0.066433	-0.166171	-0.367924	0.186775	-0.335346	-0.111745	-0.0292399	-0.49582	-0.0721487	-0.41046	-0.195515	-0.239023	-0.481033	0.0465166
LysoSM	-0.408078	0.251466	0.232043	-0.214571	1	0.0172667	-0.10957	-0.386708	0.266395	-0.252984	-0.476166	-0.0658098	-0.0890652	-0.543881	-0.271133	0.267338	-0.493069	-0.177087	0.032361	-0.494604	0.132651	0.232208	0.752757	-0.429035	0.44533	0.505243	0.725457	0.640874	0.356503	0.515654	0.175155	0.00769394	0.0863668	0.241142	0.835563	0.322196	0.468355	0.543505	0.472599	0.58174	0.763875	0.711288	-0.199297	0.29282	0.672114	0.711675	0.769466	0.75077	0.270764
18:1/14:0	0.868526	-0.370213	-0.793622	-0.222552	0.0172667	1	0.954354	0.733021	0.817025	0.899478	0.696686	0.948809	0.928551	0.777676	0.871824	0.198945	0.696125	0.799858	0.879564	0.799307	0.77989	0.519591	0.529668	0.643277	0.318482	0.0321112	0.575036	0.160727	0.234262	0.533894	-0.241849	-0.204102	0.416412	-0.0401328	0.183253	0.181501	0.00374261	-0.0586319	-0.495571	-0.168279	-0.259329	-0.394819	0.500347	0.0577564	-0.14858	0.0320923	-0.125032	-0.148561	-0.521508
18:1/16:0	0.870912	-0.399801	-0.795931	-0.126502	-0.10957	0.954354	1	0.817679	0.847357	0.960231	0.817878	0.935095	0.860816	0.805187	0.856011	0.192818	0.732105	0.754252	0.754106	0.876004	0.682503	0.362505	0.405597	0.74029	0.0715233	-0.0997016	0.484773	0.0633618	0.151164	0.53673	-0.240434	-0.27085	0.339478	-0.123705	0.059631	0.0529944	-0.0758498	-0.23385	-0.601873	-0.356753	-0.412468	-0.515604	0.575315	-0.0415019	-0.256669	-0.0576046	-0.252238	-0.307266	-0.551201
18:0/16:0	0.858174	-0.109466	-0.808172	0.0752413	-0.386708	0.733021	0.817679	1	0.53827	0.748348	0.75814	0.777941	0.717748	0.771905	0.867007	0.39726	0.568593	0.741117	0.669761	0.804039	0.684919	0.418295	0.00693319	0.981107	0.103753	-0.590712	0.0649665	-0.152954	-0.240316	0.0828121	-0.391834	-0.47476	-0.0983194	-0.491325	-0.152061	-0.367366	-0.410678	-0.433089	-0.774867	-0.517461	-0.698588	-0.677066	0.561893	-0.468557	-0.311824	-0.457323	-0.488401	-0.459427	-0.527203
18:1/18:1	0.594897	-0.173028	-0.40794	-0.22268	0.266395	0.817025	0.847357	0.53827	1	0.77483	0.680242	0.774179	0.732959	0.459803	0.590218	0.302656	0.585203	0.612449	0.642288	0.544905	0.57433	0.390766	0.70177	0.422559	0.0191511	0.237397	0.778461	0.539186	0.488488	0.826583	0.173418	0.00339017	0.396652	0.203911	0.463874	0.357367	0.25008	0.114037	-0.237064	-0.145793	-0.00912477	-0.093744	0.590046	0.272091	0.102001	0.365496	0.252429	0.131288	-0.105192
18:1/18:0	0.836887	-0.564867	-0.762175	0.00819823	-0.252984	0.899478	0.960231	0.748348	0.77483	1	0.875031	0.916739	0.824362	0.882423	0.82383	0.131837	0.854985	0.757202	0.650884	0.940259	0.58278	0.196226	0.305849	0.687412	-0.0606044	-0.0122796	0.375322	-0.0465979	0.180331	0.500781	-0.154245	-0.196102	0.397247	0.0221529	-0.120889	0.153899	-0.0418954	-0.282155	-0.514333	-0.409164	-0.420717	-0.540393	0.483177	0.0780749	-0.432704	-0.112591	-0.326019	-0.437257	-0.527572
18:0/18:0	0.78148	-0.312261	-0.529085	0.0878124	-0.476166	0.696686	0.817878	0.75814	0.680242	0.875031	1	0.775122	0.757581	0.82692	0.773068	0.152205	0.900332	0.755649	0.561748	0.857246	0.520149	0.242517	0.125653	0.719422	-0.300022	-0.135436	0.177647	0.0142962	0.240278	0.387605	0.0972976	0.0478305	0.266912	0.0587632	-0.158744	0.13465	0.00487339	-0.191723	-0.431751	-0.425139	-0.461728	-0.479295	0.68456	0.0840975	-0.329944	-0.138343	-0.286048	-0.414133	-0.27124
18:1/20:0	0.849174	-0.326081	-0.827748	-0.00489695	-0.0658098	0.948809	0.935095	0.777941	0.774179	0.916739	0.775122	1	0.939206	0.858876	0.9393	0.332624	0.746121	0.880986	0.818144	0.866223	0.816136	0.49105	0.498311	0.716186	0.214191	0.00912088	0.523679	0.0866483	0.265917	0.509408	-0.219134	-0.214078	0.335095	-0.00333929	0.125051	0.196927	0.100636	-0.0592272	-0.431062	-0.177319	-0.258021	-0.382485	0.504486	0.0917524	-0.172272	-0.0274591	-0.156658	-0.24646	-0.479729
18:1/22:2	0.879148	-0.200084	-0.703131	-0.156406	-0.0890652	0.928551	0.860816	0.717748	0.732959	0.824362	0.757581	0.939206	1	0.813486	0.933846	0.231043	0.760758	0.896625	0.938877	0.767296	0.864756	0.693725	0.511072	0.641937	0.304467	0.0578637	0.509506	0.215839	0.386582	0.453957	-0.0995119	0.0306827	0.380766	0.0719707	0.221806	0.298874	0.155039	0.137636	-0.357601	-0.0353155	-0.183824	-0.287661	0.600995	0.175068	-0.0145546	0.0790266	-0.0428249	-0.0901178	-0.368766
18:1/22:1	0.889251	-0.478976	-0.823176	0.105574	-0.543881	0.777676	0.805187	0.771905	0.459803	0.882423	0.82692	0.858876	0.813486	1	0.898085	0.0828084	0.865317	0.798229	0.646028	0.970162	0.58332	0.247853	0.0444612	0.742495	-0.0086562	-0.16927	0.0714354	-0.303071	0.0541815	0.150343	-0.309263	-0.177997	0.291889	-0.0760697	-0.351711	0.0540509	-0.124134	-0.315177	-0.556473	-0.399915	-0.558303	-0.668366	0.428655	-0.015219	-0.523933	-0.375156	-0.532532	-0.602564	-0.575387
18:1/22:0	0.908654	-0.176918	-0.856896	-0.0209976	-0.271133	0.871824	0.856011	0.867007	0.590218	0.82383	0.773068	0.9393	0.933846	0.898085	1	0.295046	0.717018	0.907418	0.856092	0.866582	0.855717	0.596305	0.295257	0.82939	0.257287	-0.230084	0.30105	-0.0529921	0.111554	0.266604	-0.334842	-0.228723	0.22233	-0.198846	0.00946527	0.00736306	-0.0326418	-0.0928145	-0.544214	-0.17731	-0.409609	-0.485115	0.584773	-0.0979654	-0.167136	-0.223262	-0.306986	-0.319242	-0.53146
18:0/22:0	0.0634937	0.276139	-0.190822	0.460252	0.267338	0.198945	0.192818	0.39726	0.302656	0.131837	0.152205	0.332624	0.231043	0.0828084	0.295046	1	0.033381	0.481412	0.233555	0.0673283	0.506022	0.316765	0.27061	0.428297	0.343683	-0.153243	0.224693	0.349295	-0.0507156	0.137955	0.165703	-0.372453	-0.397032	-0.0173793	0.294865	-0.0203724	0.00224739	0.0558693	0.0973786	-0.0510461	0.0916262	0.181194	-0.016651	-0.120138	0.112228	-0.0857573	0.263435	0.176334	0.266753
18:1/23:1	0.750081	-0.465458	-0.479185	0.00426091	-0.493069	0.696125	0.732105	0.568593	0.585203	0.854985	0.900332	0.746121	0.760758	0.865317	0.717018	0.033381	1	0.772703	0.567646	0.837558	0.44325	0.168843	0.149533	0.510027	-0.183552	0.123747	0.176625	0.0201977	0.342887	0.377631	0.158176	0.171419	0.504732	0.295411	-0.231063	0.37619	0.100909	-0.0805533	-0.271628	-0.314693	-0.333944	-0.425527	0.518544	0.3205	-0.436147	-0.139476	-0.234029	-0.360077	-0.207733
18:1/23:0	0.749988	-0.107403	-0.655899	0.0128138	-0.177087	0.799858	0.754252	0.741117	0.612449	0.757202	0.755649	0.880986	0.896625	0.798229	0.907418	0.481412	0.772703	1	0.825665	0.743845	0.871125	0.589134	0.394335	0.710436	0.325968	-0.0544832	0.362686	0.187708	0.233525	0.384346	-0.0166882	-0.113694	0.319148	0.0422978	0.1137	0.212202	0.131574	0.125019	-0.253215	-0.0158443	-0.173153	-0.22148	0.547028	0.0972887	-0.0984251	-0.155718	-0.052494	-0.0858713	-0.228205
18:1/24:2	0.819583	-0.0407037	-0.641451	-0.327548	0.032361	0.879564	0.754106	0.669761	0.642288	0.650884	0.561748	0.818144	0.938877	0.646028	0.856092	0.233555	0.567646	0.825665	1	0.583964	0.899098	0.837161	0.512445	0.5916	0.550717	-0.0279373	0.49676	0.298493	0.272645	0.353085	-0.16224	-0.0157627	0.321553	-0.0663494	0.340791	0.186047	0.0509836	0.217914	-0.369424	0.0927088	-0.133672	-0.207295	0.566419	0.0364948	0.135977	0.0786722	0.0338733	0.0958523	-0.348172
18:1/24:1	0.866763	-0.535672	-0.848162	0.0906185	-0.494604	0.799307	0.876004	0.804039	0.544905	0.940259	0.857246	0.866223	0.767296	0.970162	0.866582	0.0673283	0.837558	0.743845	0.583964	1	0.538424	0.141743	0.0621689	0.774888	-0.100322	-0.21436	0.120431	-0.320611	-0.00507205	0.247635	-0.346339	-0.286362	0.300322	-0.152989	-0.351412	-0.0339689	-0.166435	-0.416339	-0.630699	-0.473537	-0.600383	-0.706682	0.458004	-0.0882514	-0.556421	-0.369603	-0.568438	-0.640968	-0.64768
18:1/24:0	0.653192	0.0448045	-0.658982	-0.0405748	0.132651	0.77989	0.682503	0.684919	0.57433	0.58278	0.520149	0.816136	0.864756	0.58332	0.855717	0.506022	0.44325	0.871125	0.899098	0.538424	1	0.823201	0.538381	0.670902	0.587306	-0.11209	0.483	0.255092	0.190246	0.345179	-0.153979	-0.174931	0.133309	-0.124488	0.378745	0.0962836	0.121284	0.239567	-0.23032	0.200503	-0.0202441	-0.0456227	0.468537	-0.0433961	0.199988	0.0501886	0.0746537	0.0973686	-0.321773
18:1/26:2	0.491118	0.413306	-0.296082	-0.29014	0.232208	0.519591	0.362505	0.418295	0.390766	0.196226	0.242517	0.49105	0.693725	0.247853	0.596305	0.316765	0.168843	0.589134	0.837161	0.141743	0.823201	1	0.512617	0.368977	0.615928	-0.0380256	0.443724	0.470813	0.336149	0.189066	-0.0172696	0.173245	0.0423541	-0.0642888	0.602215	0.163901	0.201289	0.508864	-0.088905	0.382205	0.138989	0.152838	0.501678	0.031944	0.564171	0.279682	0.322856	0.406855	-0.0307823
SM18:1/14:0	0.134623	0.105691	-0.124709	-0.336922	0.752757	0.529668	0.405597	0.00693319	0.70177	0.305849	0.125653	0.498311	0.511072	0.0444612	0.295257	0.27061	0.149533	0.394335	0.512445	0.0621689	0.538381	0.512617	1	-0.0904697	0.372659	0.62346	0.981817	0.731152	0.714948	0.857398	0.220816	0.18117	0.502471	0.415381	0.851737	0.612232	0.703491	0.656396	0.297837	0.533884	0.62643	0.493765	0.300691	0.55408	0.587938	0.716858	0.704337	0.61847	0.121742
18:1/26:1	0.778853	-0.123539	-0.795375	0.205959	-0.429035	0.643277	0.74029	0.981107	0.422559	0.687412	0.719422	0.716186	0.641937	0.742495	0.82939	0.428297	0.510027	0.710436	0.5916	0.774888	0.670902	0.368977	-0.0904697	1	0.102252	-0.668924	-0.0518823	-0.256795	-0.341001	-0.0210477	-0.406045	-0.524943	-0.201458	-0.54159	-0.235599	-0.447813	-0.459359	-0.478429	-0.737054	-0.503491	-0.70493	-0.654124	0.475158	-0.542124	-0.353441	-0.524231	-0.54949	-0.520084	-0.550174
18:1/26:0	0.123715	0.14792	-0.293146	-0.229392	0.44533	0.318482	0.0715233	0.103753	0.0191511	-0.0606044	-0.300022	0.214191	0.304467	-0.0086562	0.257287	0.343683	-0.183552	0.325968	0.550717	-0.100322	0.587306	0.615928	0.372659	0.102252	1	-0.00404422	0.280022	0.227606	-0.112742	-0.0339709	-0.268294	-0.274795	0.0221648	-0.175127	0.394131	-0.00818782	-0.0596318	0.31745	0.0353064	0.471093	0.261966	0.227296	-0.162553	-0.144468	0.288486	0.0235393	0.228316	0.417994	-0.156497
Hex18:1/16:0	-0.263616	-0.180796	0.368532	-0.148972	0.505243	0.0321112	-0.0997016	-0.590712	0.237397	-0.0122796	-0.135436	0.00912088	0.0578637	-0.16927	-0.230084	-0.153243	0.123747	-0.0544832	-0.0279373	-0.21436	-0.11209	-0.0380256	0.62346	-0.668924	-0.00404422	1	0.58312	0.53102	0.821113	0.571475	0.555685	0.617857	0.567333	0.901434	0.448113	0.930995	0.783159	0.638093	0.711177	0.484971	0.768505	0.60234	-0.168981	0.947992	0.291414	0.754645	0.684212	0.490165	0.432333
SM18:1/16:0	0.193074	0.0651266	-0.164226	-0.392604	0.725457	0.575036	0.484773	0.0649665	0.778461	0.375322	0.177647	0.523679	0.509506	0.0714354	0.30105	0.224693	0.176625	0.362686	0.49676	0.120431	0.483	0.443724	0.981817	-0.0518823	0.280022	0.58312	1	0.712512	0.682582	0.901429	0.170295	0.124801	0.521955	0.359488	0.820014	0.555646	0.636592	0.547575	0.175546	0.404154	0.522365	0.38002	0.356394	0.504576	0.526989	0.68697	0.640634	0.555183	0.0687802
SM18:0/16:0	-0.0953265	0.447592	0.38994	-0.368775	0.640874	0.160727	0.0633618	-0.152954	0.539186	-0.0465979	0.0142962	0.0866483	0.215839	-0.303071	-0.0529921	0.349295	0.0201977	0.187708	0.298493	-0.320611	0.255092	0.470813	0.731152	-0.256795	0.227606	0.53102	0.712512	1	0.673277	0.643785	0.655865	0.446226	0.269914	0.509362	0.8619	0.588885	0.567917	0.737003	0.460737	0.435662	0.631219	0.643653	0.32218	0.528966	0.696671	0.696419	0.907142	0.858258	0.662237
Hex18:1/18:0	0.0576336	0.0847208	0.24379	-0.211004	0.356503	0.234262	0.151164	-0.240316	0.488488	0.180331	0.240278	0.265917	0.386582	0.0541815	0.111554	-0.0507156	0.342887	0.233525	0.272645	-0.00507205	0.190246	0.336149	0.714948	-0.341001	-0.112742	0.821113	0.682582	0.673277	1	0.676826	0.601011	0.763818	0.529487	0.807949	0.605669	0.908123	0.871593	0.743055	0.523817	0.440799	0.616914	0.502505	0.332291	0.907716	0.497385	0.801485	0.695487	0.487836	0.439398
SM18:1/18:0	0.172694	-0.0729237	-0.0957688	-0.346695	0.515654	0.533894	0.53673	0.0828121	0.826583	0.500781	0.387605	0.509408	0.453957	0.150343	0.266604	0.137955	0.377631	0.384346	0.353085	0.247635	0.345179	0.189066	0.857398	-0.0210477	-0.0339709	0.571475	0.901429	0.643785	0.676826	1	0.323357	0.165799	0.660255	0.428233	0.624177	0.560933	0.647182	0.439884	0.172912	0.270123	0.427402	0.306004	0.471323	0.552961	0.3344	0.58548	0.538767	0.415556	0.101654
SM18:0/18:0	-0.351151	0.128963	0.698948	0.132417	0.175155	-0.241849	-0.240434	-0.391834	0.173418	-0.154245	0.0972976	-0.219134	-0.0995119	-0.309263	-0.334842	0.165703	0.158176	-0.0166882	-0.16224	-0.346339	-0.153979	-0.0172696	0.220816	-0.406045	-0.268294	0.555685	0.170295	0.655865	0.601011	0.323357	1	0.714742	0.108341	0.787502	0.310338	0.666837	0.491275	0.526112	0.718374	0.220482	0.543805	0.62555	0.0339817	0.669054	0.273907	0.545305	0.675036	0.486553	0.829335
Hex18:1/20:0	-0.155655	0.142113	0.603548	-0.170824	0.00769394	-0.204102	-0.27085	-0.47476	0.00339017	-0.196102	0.0478305	-0.214078	0.0306827	-0.177997	-0.228723	-0.372453	0.171419	-0.113694	-0.0157627	-0.286362	-0.174931	0.173245	0.18117	-0.524943	-0.274795	0.617857	0.124801	0.446226	0.763818	0.165799	0.714742	1	0.294724	0.739545	0.272446	0.724816	0.593859	0.641089	0.576485	0.369702	0.475368	0.468607	0.174724	0.754065	0.390556	0.635034	0.518782	0.388933	0.57172
SM18:1/20:0	0.228151	-0.235502	-0.10046	-0.637002	0.0863668	0.416412	0.339478	-0.0983194	0.396652	0.397247	0.266912	0.335095	0.380766	0.291889	0.22233	-0.397032	0.504732	0.319148	0.321553	0.300322	0.133309	0.0423541	0.502471	-0.201458	0.0221648	0.567333	0.521955	0.269914	0.529487	0.660255	0.108341	0.294724	1	0.390753	0.202295	0.537667	0.535056	0.41315	0.0993839	0.361125	0.273464	0.0847383	0.402428	0.565593	0.0664142	0.244824	0.216802	0.242781	-0.0776311
SM18:0/20:0	-0.22139	-0.191624	0.454557	0.112169	0.241142	-0.0401328	-0.123705	-0.491325	0.203911	0.0221529	0.0587632	-0.00333929	0.0719707	-0.0760697	-0.198846	-0.0173793	0.295411	0.0422978	-0.0663494	-0.152989	-0.124488	-0.0642888	0.415381	-0.54159	-0.175127	0.901434	0.359488	0.509362	0.807949	0.428233	0.787502	0.739545	0.390753	1	0.267231	0.95381	0.693538	0.556928	0.749882	0.296512	0.63908	0.546447	-0.145922	0.958778	0.140307	0.640996	0.616619	0.355349	0.598638
SM18:1/22:2	-0.121887	0.537203	0.210645	-0.410768	0.835563	0.183253	0.059631	-0.152061	0.463874	-0.120889	-0.158744	0.125051	0.221806	-0.351711	0.00946527	0.294865	-0.231063	0.1137	0.340791	-0.351412	0.378745	0.602215	0.851737	-0.235599	0.394131	0.448113	0.820014	0.8619	0.605669	0.624177	0.310338	0.272446	0.202295	0.267231	1	0.422291	0.62196	0.770257	0.383289	0.632224	0.695664	0.6761	0.292113	0.375678	0.891686	0.762567	0.863238	0.86147	0.392172
Hex18:1/22:0	-0.0353331	-0.153357	0.278338	-0.066433	0.322196	0.181501	0.0529944	-0.367366	0.357367	0.153899	0.13465	0.196927	0.298874	0.0540509	0.00736306	-0.0203724	0.37619	0.212202	0.186047	-0.0339689	0.0962836	0.163901	0.612232	-0.447813	-0.00818782	0.930995	0.555646	0.588885	0.908123	0.560933	0.666837	0.724816	0.537667	0.95381	0.422291	1	0.77618	0.667045	0.654082	0.404388	0.65707	0.52053	0.0189244	0.980477	0.257393	0.703668	0.654733	0.429168	0.472906
SM18:1/22:1	-0.237411	0.241736	0.308131	-0.166171	0.468355	0.00374261	-0.0758498	-0.410678	0.25008	-0.0418954	0.00487339	0.100636	0.155039	-0.124134	-0.0326418	0.00224739	0.100909	0.131574	0.0509836	-0.166435	0.121284	0.201289	0.703491	-0.459359	-0.0596318	0.783159	0.636592	0.567917	0.871593	0.647182	0.491275	0.593859	0.535056	0.693538	0.62196	0.77618	1	0.832396	0.685881	0.696725	0.793149	0.690997	0.218249	0.829895	0.607882	0.709013	0.730898	0.570811	0.452675
SM18:1/22:0	-0.267401	0.500148	0.438076	-0.367924	0.543505	-0.0586319	-0.23385	-0.433089	0.114037	-0.282155	-0.191723	-0.0592272	0.137636	-0.315177	-0.0928145	0.0558693	-0.0805533	0.125019	0.217914	-0.416339	0.239567	0.508864	0.656396	-0.478429	0.31745	0.638093	0.547575	0.737003	0.743055	0.439884	0.526112	0.641089	0.41315	0.556928	0.770257	0.667045	0.832396	1	0.706755	0.877406	0.847698	0.822163	0.216005	0.66183	0.819502	0.693683	0.860201	0.85303	0.568501
SM18:0/22:0	-0.72164	0.187505	0.718445	0.186775	0.472599	-0.495571	-0.601873	-0.774867	-0.237064	-0.514333	-0.431751	-0.431062	-0.357601	-0.556473	-0.544214	0.0973786	-0.271628	-0.253215	-0.369424	-0.630699	-0.23032	-0.088905	0.297837	-0.737054	0.0353064	0.711177	0.175546	0.460737	0.523817	0.172912	0.718374	0.576485	0.0993839	0.749882	0.383289	0.654082	0.685881	0.706755	1	0.664456	0.895756	0.908526	-0.390104	0.695522	0.444477	0.595659	0.750894	0.607597	0.729965
SM18:1/23:1	-0.420645	0.407919	0.334036	-0.335346	0.58174	-0.168279	-0.356753	-0.517461	-0.145793	-0.409164	-0.425139	-0.177319	-0.0353155	-0.399915	-0.17731	-0.0510461	-0.314693	-0.0158443	0.0927088	-0.473537	0.200503	0.382205	0.533884	-0.503491	0.471093	0.484971	0.404154	0.435662	0.440799	0.270123	0.220482	0.369702	0.361125	0.296512	0.632224	0.404388	0.696725	0.877406	0.664456	1	0.840799	0.81061	-0.00369643	0.421783	0.748011	0.532575	0.670043	0.751538	0.292322
SM18:1/23:0	-0.608984	0.271796	0.556708	-0.111745	0.763875	-0.259329	-0.412468	-0.698588	-0.00912477	-0.420717	-0.461728	-0.258021	-0.183824	-0.558303	-0.409609	0.0916262	-0.333944	-0.173153	-0.133672	-0.600383	-0.0202441	0.138989	0.62643	-0.70493	0.261966	0.768505	0.522365	0.631219	0.616914	0.427402	0.543805	0.475368	0.273464	0.63908	0.695664	0.65707	0.793149	0.847698	0.895756	0.840799	1	0.958921	-0.227481	0.677809	0.68409	0.765985	0.88564	0.805972	0.577895
SM18:0/23:0	-0.693807	0.410568	0.670871	-0.0292399	0.711288	-0.394819	-0.515604	-0.677066	-0.093744	-0.540393	-0.479295	-0.382485	-0.287661	-0.668366	-0.485115	0.181194	-0.425527	-0.22148	-0.207295	-0.706682	-0.0456227	0.152838	0.493765	-0.654124	0.227296	0.60234	0.38002	0.643653	0.502505	0.306004	0.62555	0.468607	0.0847383	0.546447	0.6761	0.52053	0.690997	0.822163	0.908526	0.81061	0.958921	1	-0.211435	0.540675	0.727359	0.705648	0.886879	0.829864	0.679547
SM18:1/24:3	0.592675	0.321745	-0.258499	-0.49582	-0.199297	0.500347	0.575315	0.561893	0.590046	0.483177	0.68456	0.504486	0.600995	0.428655	0.584773	-0.016651	0.518544	0.547028	0.566419	0.458004	0.468537	0.501678	0.300691	0.475158	-0.162553	-0.168981	0.356394	0.32218	0.332291	0.471323	0.0339817	0.174724	0.402428	-0.145922	0.292113	0.0189244	0.218249	0.216005	-0.390104	-0.00369643	-0.227481	-0.211435	1	0.0100515	0.286103	0.0435083	0.0397843	0.0991773	-0.0765981
Hex18:1/24:1	-0.142311	-0.130646	0.363187	-0.0721487	0.29282	0.0577564	-0.0415019	-0.468557	0.272091	0.0780749	0.0840975	0.0917524	0.175068	-0.015219	-0.0979654	-0.120138	0.3205	0.0972887	0.0364948	-0.0882514	-0.0433961	0.031944	0.55408	-0.542124	-0.144468	0.947992	0.504576	0.528966	0.907716	0.552961	0.669054	0.754065	0.565593	0.958778	0.375678	0.980477	0.829895	0.66183	0.695522	0.421783	0.677809	0.540675	0.0100515	1	0.261424	0.698473	0.638656	0.407058	0.499786
SM18:1/24:2	-0.309532	0.765939	0.408441	-0.41046	0.672114	-0.14858	-0.256669	-0.311824	0.102001	-0.432704	-0.329944	-0.172272	-0.0145546	-0.523933	-0.167136	0.112228	-0.436147	-0.0984251	0.135977	-0.556421	0.199988	0.564171	0.587938	-0.353441	0.288486	0.291414	0.526989	0.696671	0.497385	0.3344	0.273907	0.390556	0.0664142	0.140307	0.891686	0.257393	0.607882	0.819502	0.444477	0.748011	0.68409	0.727359	0.286103	0.261424	1	0.670048	0.789343	0.849355	0.458921
Hex18:1/24:0	-0.259247	0.114241	0.419467	-0.195515	0.711675	0.0320923	-0.0576046	-0.457323	0.365496	-0.112591	-0.138343	-0.0274591	0.0790266	-0.375156	-0.223262	-0.0857573	-0.139476	-0.155718	0.0786722	-0.369603	0.0501886	0.279682	0.716858	-0.524231	0.0235393	0.754645	0.68697	0.696419	0.801485	0.58548	0.545305	0.635034	0.244824	0.640996	0.762567	0.703668	0.709013	0.693683	0.595659	0.532575	0.765985	0.705648	0.0435083	0.698473	0.670048	1	0.802609	0.645134	0.403932
SM18:1/24:1	-0.427591	0.469388	0.577005	-0.239023	0.769466	-0.125032	-0.252238	-0.488401	0.252429	-0.326019	-0.286048	-0.156658	-0.0428249	-0.532532	-0.306986	0.263435	-0.234029	-0.052494	0.0338733	-0.568438	0.0746537	0.322856	0.704337	-0.54949	0.228316	0.684212	0.640634	0.907142	0.695487	0.538767	0.675036	0.518782	0.216802	0.616619	0.863238	0.654733	0.730898	0.860201	0.750894	0.670043	0.88564	0.886879	0.0397843	0.638656	0.789343	0.802609	1	0.92445	0.743382
SM18:1/24:0	-0.416367	0.605011	0.546678	-0.481033	0.75077	-0.148561	-0.307266	-0.459427	0.131288	-0.437257	-0.414133	-0.24646	-0.0901178	-0.602564	-0.319242	0.176334	-0.360077	-0.0858713	0.0958523	-0.640968	0.0973686	0.406855	0.61847	-0.520084	0.417994	0.490165	0.555183	0.858258	0.487836	0.415556	0.486553	0.388933	0.242781	0.355349	0.86147	0.429168	0.570811	0.85303	0.607597	0.751538	0.805972	0.829864	0.0991773	0.407058	0.849355	0.645134	0.92445	1	0.641746
SM18:0/24:1	-0.557386	0.53136	0.828228	0.0465166	0.270764	-0.521508	-0.551201	-0.527203	-0.105192	-0.527572	-0.27124	-0.479729	-0.368766	-0.575387	-0.53146	0.266753	-0.207733	-0.228205	-0.348172	-0.64768	-0.321773	-0.0307823	0.121742	-0.550174	-0.156497	0.432333	0.0687802	0.662237	0.439398	0.101654	0.829335	0.57172	-0.0776311	0.598638	0.392172	0.472906	0.452675	0.568501	0.729965	0.292322	0.577895	0.679547	-0.0765981	0.499786	0.458921	0.403932	0.743382	0.641746	1
SM18:0/24:0	-0.384718	0.354646	0.730674	-0.192014	0.351892	-0.351055	-0.505425	-0.585701	-0.120925	-0.523284	-0.41797	-0.450154	-0.230976	-0.548191	-0.496411	-0.00520384	-0.245682	-0.297534	-0.10407	-0.672534	-0.261581	0.178808	0.176896	-0.651514	0.150085	0.540601	0.120766	0.648597	0.4686	-0.0182894	0.662728	0.678737	-0.0126529	0.605976	0.436847	0.559095	0.31279	0.590306	0.62233	0.337862	0.564456	0.594189	-0.209382	0.526043	0.462603	0.541724	0.712293	0.678709	0.796954
SM18:1/25:2	-0.463706	0.459037	0.538238	-0.238346	0.823117	-0.168478	-0.338264	-0.560256	0.105202	-0.434317	-0.442447	-0.216783	-0.0760606	-0.58844	-0.333038	0.150436	-0.39199	-0.155186	0.045041	-0.643349	0.0933227	0.398034	0.678152	-0.60156	0.359261	0.653763	0.591518	0.785822	0.634929	0.396609	0.517377	0.50961	0.133066	0.525611	0.867727	0.588237	0.692585	0.872621	0.747274	0.77893	0.91794	0.908514	-0.080559	0.568031	0.851414	0.843593	0.948765	0.907388	0.604442
SM18:1/25:1	-0.557895	0.276566	0.531285	-0.0178115	0.835745	-0.177596	-0.22864	-0.506039	0.277563	-0.273065	-0.31683	-0.177285	-0.208892	-0.576537	-0.417907	0.347827	-0.311357	-0.180196	-0.203564	-0.534053	-0.0781018	0.00345167	0.660947	-0.543593	0.0634315	0.665026	0.632464	0.768769	0.551933	0.595506	0.613399	0.273257	0.115523	0.57794	0.741981	0.551016	0.650277	0.609432	0.727804	0.484221	0.8386	0.8294	-0.154466	0.562889	0.595067	0.744386	0.89936	0.753659	0.661881
SM18:1/25:0	-0.538901	0.614109	0.584185	-0.134245	0.622	-0.286645	-0.370244	-0.403816	0.035614	-0.450591	-0.297478	-0.275645	-0.163095	-0.587421	-0.312345	0.351723	-0.339359	-0.0206351	-0.0420474	-0.608482	0.140059	0.322934	0.478725	-0.38411	0.271392	0.338669	0.378297	0.735563	0.392431	0.343223	0.607858	0.346234	0.0559771	0.328745	0.729424	0.329375	0.580587	0.802783	0.720778	0.751819	0.800423	0.909353	0.0835808	0.329069	0.788458	0.545043	0.853905	0.873243	0.682174
SM18:1/26:3	-0.401346	0.79995	0.551872	-0.238972	0.482734	-0.374652	-0.534789	-0.390881	-0.236673	-0.680691	-0.522254	-0.413413	-0.188007	-0.621644	-0.319096	0.188952	-0.543394	-0.195332	0.039971	-0.738599	0.0755055	0.539006	0.242069	-0.399	0.432798	0.147161	0.14087	0.585666	0.257389	-0.11348	0.328399	0.404508	-0.223805	0.121347	0.661408	0.161629	0.316773	0.717325	0.49955	0.642287	0.582305	0.690434	-0.00508484	0.129717	0.839836	0.44048	0.694517	0.799701	0.610414
SM18:1/26:2	-0.365463	0.777544	0.511517	-0.359355	0.601615	-0.26663	-0.428775	-0.394639	-0.0912129	-0.592027	-0.475183	-0.321067	-0.103767	-0.601566	-0.270189	0.130028	-0.506572	-0.162384	0.110511	-0.692322	0.134095	0.582041	0.421295	-0.42453	0.426957	0.257533	0.332443	0.672063	0.389158	0.0837199	0.322393	0.436711	-0.0685597	0.164487	0.794312	0.246903	0.453241	0.805341	0.504131	0.728633	0.667189	0.738703	0.0979209	0.221887	0.933944	0.581414	0.776036	0.871617	0.559683
SM18:1/26:1	-0.670354	0.647444	0.70412	0.120929	0.538937	-0.507595	-0.537915	-0.434809	-0.12439	-0.609141	-0.399115	-0.467276	-0.390747	-0.72272	-0.490454	0.449279	-0.501712	-0.22204	-0.280488	-0.738478	-0.0642559	0.153963	0.228401	-0.388634	0.122727	0.186002	0.140777	0.627125	0.212473	0.0997973	0.637288	0.278216	-0.294909	0.265291	0.57789	0.173552	0.374605	0.5885	0.704948	0.515326	0.673435	0.843819	-0.110373	0.180587	0.675278	0.441419	0.76274	0.740637	0.787179
SM18:1/26:0	-0.781678	0.3715	0.65176	0.0315919	0.424858	-0.715538	-0.780242	-0.777723	-0.581621	-0.812055	-0.734558	-0.710116	-0.616668	-0.778397	-0.683065	-0.284358	-0.766468	-0.687465	-0.515221	-0.806327	-0.391551	-0.0667892	-0.00866988	-0.705077	0.0188454	0.24238	-0.0987137	0.0607113	0.118882	-0.227962	0.17571	0.371903	-0.238066	0.13523	0.293666	0.0663997	0.341882	0.452127	0.627135	0.629092	0.625979	0.688946	-0.400505	0.15101	0.580284	0.481392	0.413137	0.431057	0.327638
Lac18:1/16:0	0.324777	0.411644	-0.308999	-0.640082	0.537188	0.498635	0.320585	0.253976	0.400055	0.0948129	-0.0918564	0.363945	0.461808	0.0194035	0.373416	0.22647	-0.0990478	0.348969	0.680226	-0.00943227	0.601147	0.747338	0.633137	0.153998	0.748919	0.0270716	0.628186	0.503941	0.158369	0.342529	-0.284726	-0.168518	0.246289	-0.233551	0.7032	0.0207263	0.135916	0.420293	-0.191214	0.408001	0.199689	0.134118	0.359263	-0.0827384	0.570585	0.223122	0.368313	0.563119	-0.117761
Lac18:1/18:0	0.10045	0.581826	-0.0789582	-0.508972	0.662508	0.32518	0.194892	0.146273	0.399479	-0.0407224	-0.0901406	0.240758	0.355137	-0.183063	0.247277	0.307762	-0.220205	0.278314	0.557084	-0.183559	0.607603	0.783566	0.701434	0.089476	0.619507	0.0497761	0.666064	0.64771	0.276159	0.434173	-0.0305527	-0.0105424	0.130939	-0.155685	0.873508	0.0567701	0.324528	0.605214	0.0477492	0.589587	0.413476	0.430006	0.426759	-0.0206208	0.816037	0.442792	0.574924	0.720719	0.0710285
Lac18:1/20:0	0.283288	0.532979	-0.197615	-0.357308	-0.00894206	0.155196	0.02061	0.245734	-0.11239	-0.133218	-0.0226073	0.134673	0.357517	0.0880036	0.383131	-0.0171321	-0.104123	0.288929	0.55252	-0.0261837	0.554154	0.809358	0.109836	0.254722	0.538114	-0.316214	0.0255255	0.0718604	0.00382206	-0.207628	-0.29139	0.09913	-0.0455629	-0.383065	0.317579	-0.193753	0.0354673	0.393598	-0.163423	0.46509	0.00819038	0.0639898	0.41061	-0.253742	0.524478	-0.00467393	0.0407513	0.260051	-0.176764
Lac18:1/22:0	0.029315	0.705254	-0.0193697	-0.321497	-0.166219	-0.188931	-0.258083	0.0351126	-0.352112	-0.327443	-0.187808	-0.0974024	-0.00627986	-0.00414404	0.129454	0.0188636	-0.159616	0.104772	0.0825835	-0.122505	0.0921376	0.31018	-0.0868563	0.0198168	0.190358	-0.238534	-0.131636	-0.0381253	-0.0469058	-0.25483	-0.308974	-0.012261	0.0538554	-0.301942	0.103541	-0.200296	0.164277	0.29812	-0.0754335	0.32059	-0.0218204	-0.0108175	0.308799	-0.158309	0.362649	-0.31077	0.00296384	0.18492	0.113467
Lac18:1/24:1	0.587779	0.285263	-0.602463	-0.332448	-0.383736	0.39501	0.388771	0.590311	0.0806132	0.322292	0.36913	0.47107	0.496349	0.56701	0.680292	0.00649603	0.319037	0.54759	0.507316	0.519854	0.497251	0.430804	0.00118121	0.567442	0.18233	-0.44655	0.0053816	-0.237998	-0.128753	-0.0268047	-0.575793	-0.273652	0.243995	-0.517085	-0.0660959	-0.326155	-0.0297327	-0.0137586	-0.552396	0.0397173	-0.413121	-0.450939	0.629682	-0.330126	0.0366113	-0.47962	-0.377818	-0.20327	-0.442612
B: Chickens fed 9 days with a diet containing 20.8 mg FB1+FB2/kg
Variables	d18:1 (So)	d18:0 (Sa)	18:1/2:0	18:0/2:0	LysoSM	18:1/14:0	18:1/16:0	18:0/16:0	18:1/18:1	18:1/18:0	18:0/18:0	18:1/20:0	18:1/22:2	18:1/22:1	18:1/22:0	18:0/22:0	18:1/23:1	18:1/23:0	18:1/24:2	18:1/24:1	18:1/24:0	18:1/26:2	SM18:1/14:0	18:1/26:1	18:1/26:0	Hex18:1/16:0	SM18:1/16:0	SM18:0/16:0	Hex18:1/18:0	SM18:1/18:0	SM18:0/18:0	Hex18:1/20:0	SM18:1/20:0	SM18:0/20:0	SM18:1/22:2	Hex18:1/22:0	SM18:1/22:1	SM18:1/22:0	SM18:0/22:0	SM18:1/23:1	SM18:1/23:0	SM18:0/23:0	SM18:1/24:3	Hex18:1/24:1	SM18:1/24:2	Hex18:1/24:0	SM18:1/24:1	SM18:1/24:0	SM18:0/24:1
d18:1 (So)	1	-0.325699	0.63982	0.601055	-0.0604749	0.657696	0.675846	0.364482	0.730106	0.165368	-0.0278321	0.402363	0.446124	0.688049	0.297083	-0.0369734	0.703118	-0.0519178	0.66565	0.643187	0.0190038	0.42344	0.322308	0.689932	0.425164	0.459545	0.226168	-0.235766	0.111729	-0.141214	-0.42973	0.214942	0.0465387	-0.418432	-0.0825593	0.407751	0.190167	-0.279155	-0.480982	0.035863	-0.361326	-0.511713	0.633553	0.3475	-0.0771764	-0.225579	0.303892	-0.300816	-0.190753
d18:0 (Sa)	-0.325699	1	0.209837	0.27055	0.560757	0.0630491	0.00573158	-0.0927571	0.169858	0.531128	0.12468	0.00803711	0.230513	0.0838817	-0.0144482	0.689281	0.0877062	0.48238	-0.0616375	0.0913454	-0.118961	-0.264357	0.273909	0.109869	0.271307	0.194316	0.522316	0.670732	0.481568	0.618568	0.731436	0.171792	0.49544	0.651365	0.375925	0.156468	0.504577	0.709833	0.68238	0.617296	0.570157	0.510542	-0.493712	0.340927	0.424196	0.293403	0.651242	0.440194	0.60706
18:1/2:0	0.63982	0.209837	1	0.468491	0.269549	0.603208	0.603287	0.170666	0.527704	0.340871	0.0438328	0.402579	0.439801	0.522673	0.340439	0.372628	0.632293	0.262584	0.535178	0.55947	0.0255093	0.403081	0.304982	0.760711	0.294609	0.533164	0.468909	0.35676	0.36966	0.103209	0.043667	0.4474	0.243244	-0.254522	0.421085	0.52004	0.622505	0.244834	0.13085	0.396556	-0.0867394	-0.0716867	-0.00535301	0.356217	0.483986	-0.0314741	0.441896	0.221837	0.381249
18:0/2:0	0.601055	0.27055	0.468491	1	0.285444	0.170304	0.243008	0.114371	0.616978	0.194709	-0.158945	-0.0230832	0.110101	0.352029	-0.170581	0.276287	0.301026	0.0281011	0.120719	0.346512	-0.323086	-0.174278	0.404885	0.475866	0.521091	0.316535	0.665992	0.347651	0.360048	0.38488	0.324293	0.359865	0.557038	0.313501	0.227284	0.441731	0.62766	0.267756	0.23729	0.519604	0.414091	0.0341277	0.33064	0.481661	0.352627	-0.0267365	0.63744	0.183886	0.315457
LysoSM	-0.0604749	0.560757	0.269549	0.285444	1	0.270073	0.359331	-0.510186	0.342235	0.533767	0.565455	0.406476	0.166782	0.296395	0.378604	0.404796	0.222092	0.819309	0.101454	0.356811	0.502585	-0.463249	0.515677	0.29029	0.723939	0.246906	0.817132	0.674274	0.298414	0.781271	0.602624	0.0324	0.728283	0.619483	0.0538761	0.0465624	0.57302	0.788188	0.476354	0.670175	0.59395	0.621138	-0.439168	0.304499	0.274788	-0.0159125	0.787623	0.751688	0.264464
18:1/14:0	0.657696	0.0630491	0.603208	0.170304	0.270073	1	0.937483	0.326034	0.727932	0.628395	0.492851	0.643762	0.773685	0.814058	0.697725	0.161937	0.841683	0.476263	0.885835	0.819449	0.477957	0.538952	0.572319	0.695251	0.587969	0.658356	0.275302	-0.0864803	0.219332	0.0929066	-0.287421	0.106445	0.0591447	-0.240919	-0.221824	0.307703	0.0550218	-0.112098	-0.459226	0.185712	-0.407056	-0.418799	0.306219	0.393376	-0.247851	-0.0720324	0.495666	-0.226522	-0.148176
18:1/16:0	0.675846	0.00573158	0.603287	0.243008	0.359331	0.937483	1	0.056471	0.821631	0.708225	0.545004	0.705817	0.785172	0.884444	0.770304	-0.0157819	0.842136	0.583514	0.887324	0.93013	0.628442	0.457925	0.487107	0.843155	0.696246	0.758018	0.424682	0.0237244	0.250621	0.29868	-0.175017	0.193156	0.259034	-0.19587	-0.222996	0.341762	0.155067	0.0164041	-0.369835	0.238021	-0.246687	-0.29841	0.281309	0.497121	-0.246623	-0.0602603	0.531718	-0.0467897	-0.131007
18:0/16:0	0.364482	-0.0927571	0.170666	0.114371	-0.510186	0.326034	0.056471	1	0.0447243	-0.160178	-0.181798	-0.305224	0.0966458	-0.022981	-0.241784	0.151077	0.129434	-0.462144	0.209492	-0.0659085	-0.486531	0.557279	0.372252	-0.111771	-0.220717	0.100507	-0.325057	-0.384461	0.0838847	-0.595896	-0.384317	0.131941	-0.478861	-0.255048	0.0293546	0.29939	-0.248596	-0.661489	-0.430913	-0.064702	-0.542735	-0.703968	0.545873	-0.00777115	-0.0387489	0.112102	-0.119736	-0.73989	0.0331718
18:1/18:1	0.730106	0.169858	0.527704	0.616978	0.342235	0.727932	0.821631	0.0447243	1	0.750497	0.320939	0.630317	0.806614	0.929062	0.58368	-0.0053219	0.84422	0.487004	0.801561	0.901562	0.318331	0.29271	0.408206	0.814942	0.768004	0.785741	0.563144	0.0628594	0.518222	0.453367	0.0459463	0.359931	0.504083	0.0819012	-0.0368985	0.549846	0.309487	0.191149	-0.151621	0.366817	0.0521567	-0.097661	0.326816	0.791335	-0.0740215	0.153577	0.735416	-0.0336589	0.0562793
18:1/18:0	0.165368	0.531128	0.340871	0.194709	0.533767	0.628395	0.708225	-0.160178	0.750497	1	0.644834	0.608146	0.848255	0.734687	0.727434	0.0371849	0.684662	0.841645	0.695922	0.808219	0.563556	0.279488	0.352898	0.643109	0.701916	0.828635	0.538918	0.286801	0.643007	0.704608	0.378584	0.414012	0.542638	0.339951	-0.00137343	0.475993	0.207241	0.445394	0.149522	0.463444	0.265952	0.195708	-0.181846	0.796861	-0.0407464	0.445335	0.712722	0.217018	0.294816
18:0/18:0	-0.0278321	0.12468	0.0438328	-0.158945	0.565455	0.492851	0.545004	-0.181798	0.320939	0.644834	1	0.431566	0.39205	0.314483	0.716699	-0.22866	0.366747	0.830981	0.465856	0.546764	0.832498	0.205172	0.483826	0.269036	0.677289	0.54153	0.321877	0.085355	0.263537	0.499096	0.212565	0.267031	0.246922	0.291071	-0.4023	0.205101	-0.163255	0.158261	-0.0574859	0.250489	0.218504	0.0846569	-0.259476	0.394005	-0.232634	0.27066	0.354556	0.30151	0.0489427
18:1/20:0	0.402363	0.00803711	0.402579	-0.0230832	0.406476	0.643762	0.705817	-0.305224	0.630317	0.608146	0.431566	1	0.759029	0.823967	0.903533	-0.00954032	0.82816	0.631603	0.783621	0.752508	0.641474	0.251117	0.00295982	0.603791	0.544373	0.447648	0.1991	-0.136048	0.208586	0.233266	-0.218305	0.000746983	0.179969	-0.211409	-0.163604	0.137342	0.0470623	0.296869	-0.221362	-0.042691	-0.152435	0.145915	-0.179355	0.420817	-0.183774	-0.0324325	0.431162	0.130158	-0.235224
18:1/22:2	0.446124	0.230513	0.439801	0.110101	0.166782	0.773685	0.785172	0.0966458	0.806614	0.848255	0.39205	0.759029	1	0.895402	0.785538	-0.0286612	0.883361	0.550839	0.917254	0.849748	0.428654	0.573869	0.167147	0.694197	0.491209	0.786357	0.207297	-0.104864	0.525969	0.272787	-0.0888495	0.304552	0.206843	-0.105822	-0.0217668	0.478449	0.0182486	0.12153	-0.218156	0.134861	-0.198456	-0.112496	0.0694431	0.715308	-0.182355	0.329523	0.504869	-0.185625	0.0392755
18:1/22:1	0.688049	0.0838817	0.522673	0.352029	0.296395	0.814058	0.884444	-0.022981	0.929062	0.734687	0.314483	0.823967	0.895402	1	0.743096	0.0199307	0.921047	0.506707	0.894554	0.919447	0.453667	0.355297	0.254396	0.81774	0.665251	0.693895	0.380868	-0.0700615	0.351394	0.312619	-0.17311	0.144869	0.323483	-0.145506	-0.123301	0.356829	0.180363	0.148141	-0.305421	0.160338	-0.179975	-0.133819	0.253953	0.630914	-0.220825	0.00969909	0.614257	-0.104425	-0.152719
18:1/22:0	0.297083	-0.0144482	0.340439	-0.170581	0.378604	0.697725	0.770304	-0.241784	0.58368	0.727434	0.716699	0.903533	0.785538	0.743096	1	-0.216876	0.790409	0.760042	0.839224	0.812509	0.821193	0.451684	0.105334	0.605993	0.581289	0.631257	0.16479	-0.141892	0.275488	0.299459	-0.145744	0.200909	0.133774	-0.171346	-0.273952	0.2494	-0.121212	0.174878	-0.246872	-0.0182376	-0.123041	0.0345234	-0.21556	0.491801	-0.268888	0.15883	0.335967	0.130898	-0.138512
18:0/22:0	-0.0369734	0.689281	0.372628	0.276287	0.404796	0.161937	-0.0157819	0.151077	-0.0053219	0.0371849	-0.22866	-0.00954032	-0.0286612	0.0199307	-0.216876	1	0.0689987	0.0770359	-0.143378	-0.100189	-0.346479	-0.346873	0.305883	0.0234888	0.0730427	-0.241631	0.304249	0.450765	-0.0249923	0.0990974	0.218688	-0.301001	0.108014	0.205926	0.26567	-0.212423	0.502235	0.412562	0.319359	0.348246	0.106554	0.1886	-0.216289	-0.192345	0.350224	-0.33162	0.461817	0.208881	0.193435
18:1/23:1	0.703118	0.0877062	0.632293	0.301026	0.222092	0.841683	0.842136	0.129434	0.84422	0.684662	0.366747	0.82816	0.883361	0.921047	0.790409	0.0689987	1	0.49129	0.944954	0.909193	0.384844	0.538001	0.211708	0.805167	0.617927	0.678284	0.232826	-0.184562	0.343174	0.170308	-0.249415	0.270449	0.108776	-0.271414	-0.144839	0.415447	0.0711725	0.0705845	-0.319824	0.036807	-0.21216	-0.213824	0.108783	0.598663	-0.159142	0.0435642	0.509794	-0.0974956	-0.0845341
18:1/23:0	-0.0519178	0.48238	0.262584	0.0281011	0.819309	0.476263	0.583514	-0.462144	0.487004	0.841645	0.830981	0.631603	0.550839	0.506707	0.760042	0.0770359	0.49129	1	0.471856	0.646536	0.772938	-0.00336328	0.365209	0.475173	0.749714	0.585956	0.604829	0.422761	0.444449	0.777755	0.469444	0.263086	0.570769	0.42886	-0.0924285	0.231838	0.245649	0.626941	0.287439	0.469882	0.437138	0.451237	-0.490936	0.54609	0.0339785	0.267043	0.660817	0.58283	0.243233
18:1/24:2	0.66565	-0.0616375	0.535178	0.120719	0.101454	0.885835	0.887324	0.209492	0.801561	0.695922	0.465856	0.783621	0.917254	0.894554	0.839224	-0.143378	0.944954	0.471856	1	0.899903	0.499	0.697308	0.254048	0.744455	0.534224	0.770775	0.133692	-0.272697	0.367567	0.0855486	-0.322315	0.30747	0.0432725	-0.322853	-0.181014	0.473954	-0.0792215	-0.105762	-0.44841	0.0104912	-0.364305	-0.334513	0.217314	0.604686	-0.262053	0.164508	0.382187	-0.251782	-0.117763
18:1/24:1	0.643187	0.0913454	0.55947	0.346512	0.356811	0.819449	0.93013	-0.0659085	0.901562	0.808219	0.546764	0.752508	0.849748	0.919447	0.812509	-0.100189	0.909193	0.646536	0.899903	1	0.59028	0.445415	0.309688	0.902792	0.773564	0.816788	0.43397	-0.00254356	0.362794	0.443962	-0.0582472	0.352876	0.329194	-0.11195	-0.225798	0.429703	0.134233	0.139178	-0.24234	0.188846	-0.025761	-0.170783	0.14319	0.676382	-0.223816	0.076952	0.56829	0.0613138	-0.0407947
18:1/24:0	0.0190038	-0.118961	0.0255093	-0.323086	0.502585	0.477957	0.628442	-0.486531	0.318331	0.563556	0.832498	0.641474	0.428654	0.453667	0.821193	-0.346479	0.384844	0.772938	0.499	0.59028	1	0.121121	0.194137	0.384187	0.565616	0.431863	0.240583	0.0228738	0.0212172	0.435225	-0.0129127	-0.0110847	0.228531	0.0106784	-0.447325	-0.0427948	-0.153145	0.169331	-0.202968	0.0448585	0.0128307	0.10484	-0.196766	0.221751	-0.397377	0.00122054	0.213487	0.290201	-0.255806
18:1/26:2	0.42344	-0.264357	0.403081	-0.174278	-0.463249	0.538952	0.457925	0.557279	0.29271	0.279488	0.205172	0.251117	0.573869	0.355297	0.451684	-0.346873	0.538001	-0.00336328	0.697308	0.445415	0.121121	1	0.00813031	0.389929	-0.0820147	0.596663	-0.331434	-0.429385	0.289928	-0.370236	-0.417177	0.51013	-0.39407	-0.556778	0.0101487	0.550656	-0.335735	-0.504968	-0.434277	-0.218537	-0.555659	-0.581254	0.21953	0.341807	-0.121345	0.372867	-0.208904	-0.493096	0.080387
SM18:1/14:0	0.322308	0.273909	0.304982	0.404885	0.515677	0.572319	0.487107	0.372252	0.408206	0.352898	0.483826	0.00295982	0.167147	0.254396	0.105334	0.305883	0.211708	0.365209	0.254048	0.309688	0.194137	0.00813031	1	0.188889	0.577708	0.406417	0.60271	0.342932	0.314567	0.287911	0.24608	0.138995	0.388151	0.428117	-0.0301779	0.317894	0.31854	0.0390463	-0.0351514	0.682003	0.0690532	-0.141631	0.313134	0.281933	0.104951	0.056796	0.634507	0.0140602	0.200431
18:1/26:1	0.689932	0.109869	0.760711	0.475866	0.29029	0.695251	0.843155	-0.111771	0.814942	0.643109	0.269036	0.603791	0.694197	0.81774	0.605993	0.0234888	0.805167	0.475173	0.744455	0.902792	0.384187	0.389929	0.188889	1	0.604639	0.735372	0.497481	0.192997	0.29474	0.407595	-0.00363349	0.397734	0.358708	-0.231781	0.00185539	0.420642	0.387717	0.208408	-0.0803177	0.236054	0.00320933	-0.155805	0.136137	0.554334	0.00054046	-0.0586277	0.493669	0.182947	0.0878452
18:1/26:0	0.425164	0.271307	0.294609	0.521091	0.723939	0.587969	0.696246	-0.220717	0.768004	0.701916	0.677289	0.544373	0.491209	0.665251	0.581289	0.0730427	0.617927	0.749714	0.534224	0.773564	0.565616	-0.0820147	0.577708	0.604639	1	0.560122	0.690633	0.212325	0.296963	0.699514	0.25553	0.194918	0.566226	0.380827	-0.34466	0.242507	0.245797	0.362201	-0.015587	0.422377	0.392225	0.111119	0.0327229	0.57971	-0.154053	-0.0149851	0.783793	0.348005	-0.00974463
Hex18:1/16:0	0.459545	0.194316	0.533164	0.316535	0.246906	0.658356	0.758018	0.100507	0.785741	0.828635	0.54153	0.447648	0.786357	0.693895	0.631257	-0.241631	0.678284	0.585956	0.770775	0.816788	0.431863	0.596663	0.406417	0.735372	0.560122	1	0.491272	0.196077	0.739682	0.460616	0.243469	0.726571	0.468303	0.114087	0.157814	0.802584	0.234796	0.146418	0.0284787	0.475446	0.0819763	-0.0727742	0.111691	0.86819	0.10137	0.560379	0.525853	0.0408353	0.410083
SM18:1/16:0	0.226168	0.522316	0.468909	0.665992	0.817132	0.275302	0.424682	-0.325057	0.563144	0.538918	0.321877	0.1991	0.207297	0.380868	0.16479	0.304249	0.232826	0.604829	0.133692	0.43397	0.240583	-0.331434	0.60271	0.497481	0.690633	0.491272	1	0.803948	0.529244	0.804729	0.699993	0.338642	0.925207	0.623816	0.328401	0.400345	0.827422	0.703056	0.538011	0.889441	0.610598	0.471487	-0.087769	0.540116	0.467077	0.129075	0.860936	0.624571	0.495555
SM18:0/16:0	-0.235766	0.670732	0.35676	0.347651	0.674274	-0.0864803	0.0237244	-0.384461	0.0628594	0.286801	0.085355	-0.136048	-0.104864	-0.0700615	-0.141892	0.450765	-0.184562	0.422761	-0.272697	-0.00254356	0.0228738	-0.429385	0.342932	0.192997	0.212325	0.196077	0.803948	1	0.408273	0.680205	0.847386	0.263186	0.769334	0.609711	0.58799	0.20737	0.857495	0.776742	0.825935	0.845855	0.638096	0.62331	-0.391029	0.207359	0.683557	0.157077	0.551709	0.738703	0.693987
Hex18:1/18:0	0.111729	0.481568	0.36966	0.360048	0.298414	0.219332	0.250621	0.0838847	0.518222	0.643007	0.263537	0.208586	0.525969	0.351394	0.275488	-0.0249923	0.343174	0.444449	0.367567	0.362794	0.0212172	0.289928	0.314567	0.29474	0.296963	0.739682	0.529244	0.408273	1	0.455758	0.597336	0.773431	0.629215	0.502778	0.617102	0.890644	0.449233	0.454726	0.498758	0.691855	0.375161	0.397176	-0.177597	0.886847	0.571137	0.854349	0.594555	0.186493	0.781723
SM18:1/18:0	-0.141214	0.618568	0.103209	0.38488	0.781271	0.0929066	0.29868	-0.595896	0.453367	0.704608	0.499096	0.233266	0.272787	0.312619	0.299459	0.0990974	0.170308	0.777755	0.0855486	0.443962	0.435225	-0.370236	0.287911	0.407595	0.699514	0.460616	0.804729	0.680205	0.455758	1	0.784561	0.302002	0.847487	0.714002	0.0607902	0.211192	0.494501	0.765354	0.577678	0.645269	0.798084	0.587049	-0.361913	0.565688	0.174117	0.256912	0.715345	0.701748	0.405251
SM18:0/18:0	-0.42973	0.731436	0.043667	0.324293	0.602624	-0.287421	-0.175017	-0.384317	0.0459463	0.378584	0.212565	-0.218305	-0.0888495	-0.17311	-0.145744	0.218688	-0.249415	0.469444	-0.322315	-0.0582472	-0.0129127	-0.417177	0.24608	-0.00363349	0.25553	0.243469	0.699993	0.847386	0.597336	0.784561	1	0.451047	0.783786	0.860523	0.504139	0.339406	0.616204	0.776427	0.909531	0.788133	0.877745	0.737997	-0.505584	0.428561	0.620467	0.507715	0.527041	0.710443	0.797769
Hex18:1/20:0	0.214942	0.171792	0.4474	0.359865	0.0324	0.106445	0.193156	0.131941	0.359931	0.414012	0.267031	0.000746983	0.304552	0.144869	0.200909	-0.301001	0.270449	0.263086	0.30747	0.352876	-0.0110847	0.51013	0.138995	0.397734	0.194918	0.726571	0.338642	0.263186	0.773431	0.302002	0.451047	1	0.36058	0.189346	0.453984	0.906586	0.281405	0.171179	0.394595	0.428471	0.363031	0.110281	-0.144548	0.738551	0.516582	0.745085	0.216103	0.231084	0.762488
SM18:1/20:0	0.0465387	0.49544	0.243244	0.557038	0.728283	0.0591447	0.259034	-0.478861	0.504083	0.542638	0.246922	0.179969	0.206843	0.323483	0.133774	0.108014	0.108776	0.570769	0.0432725	0.329194	0.228531	-0.39407	0.388151	0.358708	0.566226	0.468303	0.925207	0.769334	0.629215	0.847487	0.783786	0.36058	1	0.723043	0.416731	0.425084	0.76161	0.769107	0.632867	0.847299	0.690954	0.647838	-0.153844	0.623735	0.468473	0.328072	0.783409	0.609578	0.529576
SM18:0/20:0	-0.418432	0.651365	-0.254522	0.313501	0.619483	-0.240919	-0.19587	-0.255048	0.0819012	0.339951	0.291071	-0.211409	-0.105822	-0.145506	-0.171346	0.205926	-0.271414	0.42886	-0.322853	-0.11195	0.0106784	-0.556778	0.428117	-0.231781	0.380827	0.114087	0.623816	0.609711	0.502778	0.714002	0.860523	0.189346	0.723043	1	0.228792	0.193038	0.387167	0.617869	0.662894	0.720117	0.795695	0.648428	-0.295297	0.387848	0.347702	0.441701	0.599908	0.472708	0.522861
SM18:1/22:2	-0.0825593	0.375925	0.421085	0.227284	0.0538761	-0.221824	-0.222996	0.0293546	-0.0368985	-0.00137343	-0.4023	-0.163604	-0.0217668	-0.123301	-0.273952	0.26567	-0.144839	-0.0924285	-0.181014	-0.225798	-0.447325	0.0101487	-0.0301779	0.00185539	-0.34466	0.157814	0.328401	0.58799	0.617102	0.0607902	0.504139	0.453984	0.416731	0.228792	1	0.536295	0.700751	0.46101	0.690841	0.564904	0.209	0.479193	-0.247374	0.273815	0.906592	0.475821	0.201442	0.250998	0.790358
Hex18:1/22:0	0.407751	0.156468	0.52004	0.441731	0.0465624	0.307703	0.341762	0.29939	0.549846	0.475993	0.205101	0.137342	0.478449	0.356829	0.2494	-0.212423	0.415447	0.231838	0.473954	0.429703	-0.0427948	0.550656	0.317894	0.420642	0.242507	0.802584	0.400345	0.20737	0.890644	0.211192	0.339406	0.906586	0.425084	0.193038	0.536295	1	0.352105	0.12852	0.255706	0.533619	0.16445	0.0550586	0.0784324	0.836939	0.514481	0.757925	0.392447	0.0141585	0.693986
SM18:1/22:1	0.190167	0.504577	0.622505	0.62766	0.57302	0.0550218	0.155067	-0.248596	0.309487	0.207241	-0.163255	0.0470623	0.0182486	0.180363	-0.121212	0.502235	0.0711725	0.245649	-0.0792215	0.134233	-0.153145	-0.335735	0.31854	0.387717	0.245797	0.234796	0.827422	0.857495	0.449233	0.494501	0.616204	0.281405	0.76161	0.387167	0.700751	0.352105	1	0.71099	0.676233	0.796842	0.45703	0.513107	-0.153144	0.301174	0.770316	0.0343606	0.641093	0.587986	0.606748
SM18:1/22:0	-0.279155	0.709833	0.244834	0.267756	0.788188	-0.112098	0.0164041	-0.661489	0.191149	0.445394	0.158261	0.296869	0.12153	0.148141	0.174878	0.412562	0.0705845	0.626941	-0.105762	0.139178	0.169331	-0.504968	0.0390463	0.208408	0.362201	0.146418	0.703056	0.776742	0.454726	0.765354	0.776427	0.171179	0.769107	0.617869	0.46101	0.12852	0.71099	1	0.82368	0.615567	0.741543	0.900337	-0.680457	0.360511	0.568634	0.202366	0.646813	0.835995	0.532362
SM18:0/22:0	-0.480982	0.68238	0.13085	0.23729	0.476354	-0.459226	-0.369835	-0.430913	-0.151621	0.149522	-0.0574859	-0.221362	-0.218156	-0.305421	-0.246872	0.319359	-0.319824	0.287439	-0.44841	-0.24234	-0.202968	-0.434277	-0.0351514	-0.0803177	-0.015587	0.0284787	0.538011	0.825935	0.498758	0.577678	0.909531	0.394595	0.632867	0.662894	0.690841	0.255706	0.676233	0.82368	1	0.634279	0.804215	0.829386	-0.668177	0.247432	0.799556	0.41583	0.345833	0.763643	0.820897
SM18:1/23:1	0.035863	0.617296	0.396556	0.519604	0.670175	0.185712	0.238021	-0.064702	0.366817	0.463444	0.250489	-0.042691	0.134861	0.160338	-0.0182376	0.348246	0.036807	0.469882	0.0104912	0.188846	0.0448585	-0.218537	0.682003	0.236054	0.422377	0.475446	0.889441	0.845855	0.691855	0.645269	0.788133	0.428471	0.847299	0.720117	0.564904	0.533619	0.796842	0.615567	0.634279	1	0.528324	0.464676	-0.100788	0.521053	0.639047	0.391535	0.768211	0.468132	0.720084
SM18:1/23:0	-0.361326	0.570157	-0.0867394	0.414091	0.59395	-0.407056	-0.246687	-0.542735	0.0521567	0.265952	0.218504	-0.152435	-0.198456	-0.179975	-0.123041	0.106554	-0.21216	0.437138	-0.364305	-0.025761	0.0128307	-0.555659	0.0690532	0.00320933	0.392225	0.0819763	0.610598	0.638096	0.375161	0.798084	0.877745	0.363031	0.690954	0.795695	0.209	0.16445	0.45703	0.741543	0.804215	0.528324	1	0.72651	-0.528914	0.360399	0.433088	0.307701	0.449101	0.789819	0.562894
SM18:0/23:0	-0.511713	0.510542	-0.0716867	0.0341277	0.621138	-0.418799	-0.29841	-0.703968	-0.097661	0.195708	0.0846569	0.145915	-0.112496	-0.133819	0.0345234	0.1886	-0.213824	0.451237	-0.334513	-0.170783	0.10484	-0.581254	-0.141631	-0.155805	0.111119	-0.0727742	0.471487	0.62331	0.397176	0.587049	0.737997	0.110281	0.647838	0.648428	0.479193	0.0550586	0.513107	0.900337	0.829386	0.464676	0.72651	1	-0.740823	0.22569	0.569295	0.319877	0.383285	0.770494	0.487528
SM18:1/24:3	0.633553	-0.493712	-0.00535301	0.33064	-0.439168	0.306219	0.281309	0.545873	0.326816	-0.181846	-0.259476	-0.179355	0.0694431	0.253953	-0.21556	-0.216289	0.108783	-0.490936	0.217314	0.14319	-0.196766	0.21953	0.313134	0.136137	0.0327229	0.111691	-0.087769	-0.391029	-0.177597	-0.361913	-0.505584	-0.144548	-0.153844	-0.295297	-0.247374	0.0784324	-0.153144	-0.680457	-0.668177	-0.100788	-0.528914	-0.740823	1	-0.0124854	-0.400241	-0.254153	-0.0571314	-0.725333	-0.419067
Hex18:1/24:1	0.3475	0.340927	0.356217	0.481661	0.304499	0.393376	0.497121	-0.00777115	0.791335	0.796861	0.394005	0.420817	0.715308	0.630914	0.491801	-0.192345	0.598663	0.54609	0.604686	0.676382	0.221751	0.341807	0.281933	0.554334	0.57971	0.86819	0.540116	0.207359	0.886847	0.565688	0.428561	0.738551	0.623735	0.387848	0.273815	0.836939	0.301174	0.360511	0.247432	0.521053	0.360399	0.22569	-0.0124854	1	0.240397	0.703724	0.653039	0.128928	0.510608
SM18:1/24:2	-0.0771764	0.424196	0.483986	0.352627	0.274788	-0.247851	-0.246623	-0.0387489	-0.0740215	-0.0407464	-0.232634	-0.183774	-0.182355	-0.220825	-0.268888	0.350224	-0.159142	0.0339785	-0.262053	-0.223816	-0.397377	-0.121345	0.104951	0.00054046	-0.154053	0.10137	0.467077	0.683557	0.571137	0.174117	0.620467	0.516582	0.468473	0.347702	0.906592	0.514481	0.770316	0.568634	0.799556	0.639047	0.433088	0.569295	-0.400241	0.240397	1	0.388871	0.286986	0.510511	0.850608
Hex18:1/24:0	-0.225579	0.293403	-0.0314741	-0.0267365	-0.0159125	-0.0720324	-0.0602603	0.112102	0.153577	0.445335	0.27066	-0.0324325	0.329523	0.00969909	0.15883	-0.33162	0.0435642	0.267043	0.164508	0.076952	0.00122054	0.372867	0.056796	-0.0586277	-0.0149851	0.560379	0.129075	0.157077	0.854349	0.256912	0.507715	0.745085	0.328072	0.441701	0.475821	0.757925	0.0343606	0.202366	0.41583	0.391535	0.307701	0.319877	-0.254153	0.703724	0.388871	1	0.168705	0.031169	0.701393
SM18:1/24:1	0.303892	0.651242	0.441896	0.63744	0.787623	0.495666	0.531718	-0.119736	0.735416	0.712722	0.354556	0.431162	0.504869	0.614257	0.335967	0.461817	0.509794	0.660817	0.382187	0.56829	0.213487	-0.208904	0.634507	0.493669	0.783793	0.525853	0.860936	0.551709	0.594555	0.715345	0.527041	0.216103	0.783409	0.599908	0.201442	0.392447	0.641093	0.646813	0.345833	0.768211	0.449101	0.383285	-0.0571314	0.653039	0.286986	0.168705	1	0.370495	0.354465
SM18:1/24:0	-0.300816	0.440194	0.221837	0.183886	0.751688	-0.226522	-0.0467897	-0.73989	-0.0336589	0.217018	0.30151	0.130158	-0.185625	-0.104425	0.130898	0.208881	-0.0974956	0.58283	-0.251782	0.0613138	0.290201	-0.493096	0.0140602	0.182947	0.348005	0.0408353	0.624571	0.738703	0.186493	0.701748	0.710443	0.231084	0.609578	0.472708	0.250998	0.0141585	0.587986	0.835995	0.763643	0.468132	0.789819	0.770494	-0.725333	0.128928	0.510511	0.031169	0.370495	1	0.459008
SM18:0/24:1	-0.190753	0.60706	0.381249	0.315457	0.264464	-0.148176	-0.131007	0.0331718	0.0562793	0.294816	0.0489427	-0.235224	0.0392755	-0.152719	-0.138512	0.193435	-0.0845341	0.243233	-0.117763	-0.0407947	-0.255806	0.080387	0.200431	0.0878452	-0.00974463	0.410083	0.495555	0.693987	0.781723	0.405251	0.797769	0.762488	0.529576	0.522861	0.790358	0.693986	0.606748	0.532362	0.820897	0.720084	0.562894	0.487528	-0.419067	0.510608	0.850608	0.701393	0.354465	0.459008	1
SM18:0/24:0	-0.340997	0.41449	0.220069	0.241915	0.179089	-0.536757	-0.421433	-0.320057	-0.218907	-0.0483792	-0.245384	-0.346276	-0.304233	-0.385521	-0.353049	0.115883	-0.370903	0.028055	-0.458909	-0.300005	-0.3411	-0.232621	-0.18994	-0.0384479	-0.234456	0.042884	0.386897	0.713637	0.456498	0.349028	0.754398	0.540411	0.4877	0.400045	0.791582	0.371359	0.644971	0.604921	0.913233	0.501664	0.645154	0.645229	-0.516735	0.196081	0.859825	0.425105	0.0891826	0.638136	0.838857
SM18:1/25:2	-0.26992	0.650348	0.414375	0.263813	0.461914	-0.230743	-0.203986	-0.230047	-0.0432434	0.19948	-0.00975958	-0.0661338	-0.062105	-0.171232	-0.0938668	0.386893	-0.0938395	0.316751	-0.220209	-0.111566	-0.205952	-0.173672	0.0665605	0.052716	0.00122386	0.174487	0.529126	0.769218	0.622387	0.430447	0.789782	0.536915	0.550322	0.500342	0.797918	0.455079	0.722252	0.766133	0.925158	0.660436	0.6331	0.72975	-0.660957	0.334526	0.923791	0.469098	0.393032	0.697	0.898438
SM18:1/25:1	-0.11868	0.487354	0.457104	0.265572	0.270916	-0.0850751	-0.0433226	-0.0116088	0.0866444	0.312964	0.143545	-0.122662	0.0844519	-0.0987766	0.000517423	0.0794636	-0.000227254	0.304515	-0.0155011	0.0471904	-0.131101	0.185631	0.172565	0.17003	0.0245594	0.482033	0.479373	0.642451	0.785439	0.37934	0.72995	0.834682	0.502574	0.417403	0.761808	0.748314	0.575906	0.507722	0.767819	0.670011	0.51731	0.47041	-0.452539	0.538715	0.844932	0.709022	0.30945	0.498594	0.97646
SM18:1/25:0	-0.154796	0.3489	0.247347	0.304337	0.764534	-0.210625	-0.0589192	-0.64174	0.0577867	0.161885	0.254399	0.195846	-0.173153	-0.0462973	0.123353	0.180494	-0.0469911	0.521773	-0.203566	0.039434	0.208017	-0.500487	0.111881	0.111067	0.379925	0.0545234	0.672165	0.668576	0.333373	0.609312	0.675017	0.274846	0.681786	0.532829	0.364931	0.173311	0.64891	0.830159	0.738726	0.547214	0.755716	0.829429	-0.624501	0.242174	0.631463	0.124382	0.469584	0.921295	0.482936
SM18:1/26:3	-0.0937194	0.186378	0.47775	0.0639645	-0.0678392	-0.252525	-0.358642	0.21415	-0.405294	-0.385226	-0.389409	-0.338676	-0.373145	-0.44649	-0.392562	0.404982	-0.261046	-0.279726	-0.339322	-0.424023	-0.526688	0.0675768	-0.0487133	-0.138148	-0.488579	-0.181099	0.0319284	0.401579	0.155324	-0.284336	0.219873	0.300199	-0.0703585	-0.0940682	0.730436	0.234756	0.476366	0.178025	0.504861	0.243082	0.0453336	0.193667	-0.335224	-0.208087	0.823317	0.0920055	-0.14548	0.267957	0.603488
SM18:1/26:2	0.149097	-0.0116002	0.539953	0.21173	0.138434	-0.17766	-0.0488783	-0.328829	0.0642399	-0.0295478	-0.183325	0.221919	-0.000563113	0.0383535	0.108305	-0.0575083	0.111663	0.0798486	0.0219763	0.0481062	-0.0889592	0.0754883	-0.28909	0.272237	-0.108681	0.181665	0.278457	0.358968	0.413672	0.0826304	0.272538	0.52357	0.335427	-0.0804713	0.696322	0.473747	0.572804	0.473082	0.530059	0.241279	0.256319	0.502235	-0.40739	0.274952	0.758884	0.259442	0.0703974	0.515433	0.529986
SM18:1/26:1	-0.0798755	0.41463	0.491806	0.288876	0.660057	-0.0786872	0.076432	-0.535457	0.148129	0.310481	0.244508	0.23197	0.0251298	0.0549674	0.219422	0.156121	0.0897928	0.553469	-0.0291004	0.175434	0.195529	-0.197369	0.0778299	0.316056	0.294202	0.306226	0.678748	0.744146	0.52516	0.595289	0.703193	0.528955	0.679712	0.400146	0.569728	0.41586	0.731508	0.820084	0.793314	0.615118	0.664634	0.751522	-0.645648	0.395302	0.762744	0.304975	0.453359	0.884302	0.692979
SM18:1/26:0	-0.366348	0.110972	0.0148264	-0.0689458	0.426581	-0.414793	-0.19252	-0.812155	-0.162375	0.0888178	0.250898	0.170583	-0.193327	-0.182228	0.208795	-0.205626	-0.135978	0.434778	-0.229574	-0.00440449	0.326646	-0.305647	-0.37946	0.0771391	0.131044	-0.00488844	0.269504	0.397215	0.123784	0.495495	0.499885	0.300063	0.375953	0.240046	0.165385	0.0215072	0.258296	0.637731	0.618369	0.101844	0.670513	0.720235	-0.761768	0.116324	0.36284	0.162497	0.0088954	0.862018	0.326155
Lac18:1/16:0	0.442647	-0.0224115	0.801994	0.26963	0.288075	0.420244	0.512181	-0.052722	0.226945	0.120733	0.165413	0.151914	0.072419	0.221203	0.21517	0.165049	0.280082	0.233728	0.25436	0.39092	0.234425	0.23092	0.301075	0.648199	0.226456	0.360614	0.449239	0.451967	0.0218386	0.142718	0.0582046	0.312726	0.196439	-0.288633	0.201816	0.235506	0.533818	0.131323	0.0993005	0.328494	-0.037966	-0.134897	0.00320428	0.0219114	0.333597	-0.259035	0.168197	0.388015	0.236605
Lac18:1/18:0	-0.080016	0.327097	0.566011	-0.0910703	0.620277	0.231208	0.285921	-0.44828	-0.0271405	0.198922	0.239675	0.359163	0.0441046	0.109443	0.32737	0.459521	0.152594	0.514472	0.0573757	0.185326	0.383056	-0.146395	0.105346	0.358706	0.168305	0.0598064	0.425451	0.610564	-0.0209914	0.312369	0.257317	-0.0317958	0.264333	-0.0390005	0.249549	-0.117915	0.545187	0.582441	0.391298	0.321687	0.151431	0.398037	-0.564115	-0.135466	0.387886	-0.26588	0.265264	0.690944	0.222398
Lac18:1/20:0	0.478982	0.0078755	0.695719	0.369003	0.164653	0.421143	0.41051	0.370129	0.356926	0.238263	0.284136	0.057641	0.219869	0.201835	0.195895	-0.0503597	0.312186	0.198496	0.379881	0.333631	0.0439159	0.50375	0.554981	0.396005	0.223153	0.640242	0.438997	0.303928	0.606992	0.0480342	0.20868	0.744878	0.291635	0.0318076	0.460855	0.817575	0.433578	0.0189756	0.156038	0.565205	0.00475046	-0.0887548	0.1108	0.484048	0.563083	0.415415	0.302748	0.112792	0.592664
Lac18:1/22:0	0.61856	-0.584783	0.220913	0.116013	-0.117146	0.549079	0.595292	0.337562	0.356711	0.0854456	0.431319	0.0954516	0.175928	0.30188	0.308705	-0.483279	0.311998	0.0409789	0.485172	0.46245	0.403263	0.503105	0.47174	0.381308	0.345239	0.453111	0.0496487	-0.299539	-0.0744181	-0.144847	-0.400601	0.2242	-0.116541	-0.336439	-0.421266	0.269951	-0.22782	-0.586715	-0.621523	-0.0342237	-0.385347	-0.671248	0.619542	0.13041	-0.367889	-0.102354	-0.0604208	-0.314443	-0.274549
Lac18:1/24:1	0.75973	-0.519109	0.460517	0.237315	-0.0216831	0.634957	0.715212	0.193961	0.44906	0.0857297	0.261319	0.245012	0.2247	0.458051	0.335369	-0.251229	0.440029	0.0494737	0.52482	0.568669	0.385969	0.401174	0.384174	0.61584	0.380295	0.396647	0.160085	-0.171242	-0.20763	-0.10217	-0.457052	0.0804751	-0.0645161	-0.494207	-0.365808	0.13244	0.000627608	-0.436503	-0.592312	-0.0410458	-0.421781	-0.642421	0.601523	0.036125	-0.321771	-0.393529	0.0311702	-0.192577	-0.352709
*Values in bold are different from 0 at significance level alpha=0.05
[truncated: 13 more columns]

## Sheet: Table S3
Table S3. Linearity of the method measured for the sphingolipids available as standards
Analyte1	Category2	Conc2	Eq. Conc3	a4	b4	(R²)4	RSD (%)5
m18:1 (dSo)	SB	0.1-25	2-500	1.0088	-0.0556	0.9987	10
m18:0 (dSa)	SB	0.1-25	2-500	1.0322	-0.1813	0.9981	8
d18:1 (So)	SB	16-4000	320-80,000	0.9649	8.5925	0.9993	3
d18:0 (Sa)	SB	7.8-1000	156-20,000	0.9358	5.7919	0.9991	13
18:1/2:0	Cer	1-62.5	20-1250	0.9572	0.8467	0.9991	4
18:0/2:0	DHCer	2-500	40-10,000	1.1765	-6.8236	0.9974	9
d18:1P	SBP	15.6-4000	312-80,000	1.0995	30.981	0.9956	19
d18:0P	SBP	15.6-4000	312-80,000	1.1563	45.987	0.9987	17
GluSo	HexCer	0.5-125	2500-10-01	1.0045	0.5057	0.9998	12
LysoSM	SM	0.5-31	10-620	1.0018	0.1067	0.9999	7
18:1/14:0	Cer	1-250	20-5000	1.0089	-0.7316	0.9997	5
m18:1/16:0	dCer	15.6-1000	312-20,000	0.9215	8.9151	0.9981	8
18:1/16:0	Cer	125-32,000	2500-640,000	1.0078	22.383	0.9991	7
18:0/16:0	DHCer	15.6-2000	312-40,000	1.0208	-2.4617	0.9992	8
18:1/18:0	Cer	15.6-4000	312-80,000	1.0298	-15.241	0.9997	6
18:1/20:0	Cer	7.8-2000	156-40,000	0.9903	3.9604	0.9997	5
m18:1/22:0	dCer	15.6-4000	312-80,000	0.9114	37.893	0.9973	5
m18:0/22:0	dDHCer	15.6-2000	312-40,000	1.003	23.086	0.9972	7
18:1/16:0P	CerP	15.6-2000	312-40,000	1.1813	48.99	0.9526	20
18:1/22:0	Cer	62.5-16,000	1250-320,000	0.9666	58.619	0.9985	6
LacSo	LacCer	1-125	20-2500	0.9621	0.677	0.9988	12
m18:1/24:1	dCer	15.6-2000	312-40,000	0.9911	6.5782	0.9983	9
m18:1/24:0	dCer	15.6-2000	312-40,000	1.0131	-8.3676	0.9962	7
m18:0/24:1	dDHCer	15.6-2000	312-40,000	1.0088	-5.9114	0.998	7
m18:0/24:0	dDHCer	15.6-2000	312-40,000	0.9929	7.4114	0.9968	10
18:1/24:1	Cer	62.5-16,000	1250-320,000	0.9461	66.787	0.9983	7
18:1/24:0	Cer	31-8000	625-160,000	1.026	-33.76	0.9973	11
18:0/24:0	DHCer	7.8-2000	156-40,000	1.0226	8.9946	0.9995	8
SM18:1/14:0	SM	2-250	40-5000	0.9551	0.6853	0.9996	12
Glu18:1/16:0	HexCer	15.6-4000	312-80,000	0.9673	11.485	0.9996	7
SM18:1/16:0	SM	62.5-16,000	1250-320,000	0.9872	32.178	0.9988	5
SM18:1/18:1	SM	4-1000	80-20,000	1.133	-21.235	0.9976	17
SM18:1/18:0	SM	125-32.000	2500-640,000	0.9712	214.85	0.9968	10
SM18:1/20:0	SM	15.6-4000	312-80,000	1.0066	10.446	0.9997	20
SM18:1/22:0	SM	62.5-16,000	1250-320,000	1.02	14.615	0.9949	13
Glu18:1/24:1	HexCer	7.8-2000	156-40,000	0.9914	9.6411	0.9984	20
SM18:1/24:1	SM	125-32.000	2500-640,000	1.0023	-37.317	0.9993	12
SM18:1/24:0	SM	125-4000	2500-80,000	1.0379	-46.043	0.9976	18
Lac18:1/16:0	LacCer	15.6-2000	312-40,000	1.0238	-15.214	0.9986	8
ST18:1/24:1	STCer	15.6-2000	312-40,000	1.0061	6.9587	0.9977	27
ST18:1/24:0	STCer	31-2000	625-40,000	1.0065	6.7273	0.9963	16
Lac18:1/24:1	LacCer	15.6-2000	312-40,000	0.9691	14.482	0.9937	15
1 dSo= deoxysphingosine, dSa= deoxysphinganine, So = sphingosine, Sa = sphinganine, GluSo = glucosylsphingosine, LysoSM = lysosphingomyelin, LacSo = lactosylsphingosine, SM = sphingomyelin, Glu = glucosyl, Lac = lactosyl
2 SB= sphingoid base; SBP = sphingoid base-1-phosphate; Cer = ceramide; CerP = ceramide-1-phosphate; DHCer= dihydroceramide; dCer = deoxyceramide; dDHCer = deoxydihydroceramide; HexCer = hexosylceramide; LacCer = lactosylceramide; STCer = ceramide sulfatide; SM = sphingomyelin
3 Conc = concentration in the net solvent expressed in pmol/mL. Ratio between each concentration tested is 2. n = 3 per concentration
4 Eq. Conc = equivalent concentration in liver expressed in pmol/g
5 Calibration curve: a = slope. b = y-intercept. R² = coefficient of determination
6 RSD = relative standard deviation
Determined from the calibration curves obtained for the standards. Final concentrations in tissues were corrected by the recovery measured for the IS of the corresponding class (Table S2). No correction was used for 18:1/2:0, 18:0/2:0, GluSo, LysoSM, and LacSo. Concentrations of sphingolipids not available as standards were calculated using the calibration curves obtained for standards of the sam…

## Sheet: Table S4
Table S4: Recovery of the internal standards of sphingolipids measured in the heart, gizzard, and breast muscle of chickens
	Heart		Gizzard		Breast muscle
Analyte	R (%)	RSD (%)	R (%)	RSD (%)	R (%)	RSD (%)
d17:1	82	5	130	11	51	10
d17:0	84	7	100	7	59	8
d17:1P	167	8	164	13	70	11
d17:0P	151	9	143	8	76	11
m18:1/12:0	77	11	103	12	54	9
18:1/12:0	88	10	98	8	80	11
18:1/12:0P	850	10	293	6	148	10
Glud18:1C12:0	112	11	105	9	74	10
SM18:1/12:0	67	14	89	8	71	10
18:1/25:0	73	25	64	16	60	14
ST18:1/12:0	90	16	106	10	64	12
Lac18:1/12:0	90	12	109	16	130	11
Recovery (R) and repeatability (RSD) measured the same day on spiked samples (n=20) with the internal standards before extraction at 6250 pmol/g tissue
